# Supplementary material for: Influence of stereochemistry on the activity of rapadocin, an isoform-specific inhibitor of the nucleoside transporter ENT1
Source: Royal Society of Chemistry journal article supplement (doi:10.1039/d1sc02295d), 2021-01-01
Supplement: d1sc02295d1.pdf [file d1sc02295d1.pdf]

## Supplementary Information For

### **Influence of stereochemistry on the activity of the rapadocin, an isoform-specific inhibitor of nucleoside transporter ENT1**

Yuefan Wang<sup>†ab</sup>, Hanjing Peng<sup>†ab</sup>, Zufeng Guo<sup>†abc</sup>, Brett R Ullman<sup>d</sup>, Kana Yamamoto<sup>d</sup>, Sam Y Hong<sup>d</sup> and Jun O Liu<sup>abef\*</sup>

<sup>a</sup>Department of Pharmacology, Johns Hopkins School of Medicine, 725 North Wolfe Street, Baltimore, MD 21205, USA.

<sup>b</sup>SJ Yan and HJ Mao Laboratory of Chemical Biology, Johns Hopkins University School of Medicine, Baltimore, MD21205, USA

<sup>c</sup>Center for Novel Target and Therapeutic Intervention, Institute of Life Sciences, Chongqing Medical University, Chongqing, China 400016

<sup>d</sup>Rapafusyn Pharmaceuticals Inc., Baltimore, MD 21205, USA.

<sup>e</sup>Sidney Kimmel Comprehensive Cancer Center, Johns Hopkins University School of Medicine, Baltimore, MD21205, USA

<sup>f</sup>E-mail: joliu@jhu.edu

## Table of Contents

### BIOLOGY

|                                                        |   |
|--------------------------------------------------------|---|
| Biological Reagents.....                               | 3 |
| Cell Culture.....                                      | 3 |
| Proliferation Assay.....                               | 3 |
| Overexpression and Purification of FKBP12 Protein..... | 4 |
| Measurement of $K_d$ Values for Rapafucins.....        | 4 |
| Extraction of Ent1 Protein from Red Blood Cells.....   | 4 |
| GST-FKBP12 Affinity Pull-down.....                     | 4 |
| Western Blot Analysis.....                             | 5 |
| CRISPR-Cas9 Knockout Protocol.....                     | 5 |

### CHEMISTRY

|                                                                                  |    |
|----------------------------------------------------------------------------------|----|
| General Information.....                                                         | 5  |
| LC-MS Analytical Protocol for Macrocycles.....                                   | 6  |
| Screening for the diastereoselective synthesis of dipeptide 4.....               | 6  |
| Experimental Procedures and Spectroscopic Data of the Synthesized Compounds..... | 6  |
| Synthesis of compound 4.....                                                     | 6  |
| Synthesis of compound 7.....                                                     | 6  |
| Synthesis of compound 8.....                                                     | 7  |
| Synthesis of compound 9.....                                                     | 7  |
| Synthesis of compound 10.....                                                    | 8  |
| Synthesis of compound 2.....                                                     | 8  |
| Synthesis of rapadocin 1a.....                                                   | 9  |
| Synthesis of compound 13.....                                                    | 10 |
| Synthesis of rapadocin 1b.....                                                   | 10 |
| Synthesis of rapadocin 1c.....                                                   | 11 |
| Synthesis of rapadocin 1d.....                                                   | 11 |
| Synthesis of rapadocin 1a from RCM strategy.....                                 | 11 |
| Spectra of the Synthesized Compounds.....                                        | 12 |
| Compound 4: $^1\text{H}$ -NMR.....                                               | 12 |
| Compound 4: $^1\text{H}$ -NMR.....                                               | 13 |
| Compound 4: $^{13}\text{C}$ -NMR.....                                            | 14 |
| Compound 7: $^1\text{H}$ -NMR.....                                               | 15 |
| Compound 7: $^{13}\text{C}$ -NMR.....                                            | 16 |
| Compound 8: $^1\text{H}$ -NMR.....                                               | 17 |
| Compound 8: $^{13}\text{C}$ -NMR.....                                            | 18 |
| Compound 9: $^1\text{H}$ -NMR.....                                               | 19 |
| Compound 9: $^{13}\text{C}$ -NMR.....                                            | 20 |
| Compound 10: $^1\text{H}$ -NMR.....                                              | 21 |
| Compound 10: $^{13}\text{C}$ -NMR.....                                           | 22 |
| Compound 2: $^1\text{H}$ -NMR.....                                               | 23 |

|                                                                                                     |           |
|-----------------------------------------------------------------------------------------------------|-----------|
| Compound 2: $^{13}\text{C}$ -NMR.....                                                               | 24        |
| Rapadocin 1a: $^1\text{H}$ -NMR.....                                                                | 25        |
| Rapadocin 1a: $^{13}\text{C}$ -NMR.....                                                             | 26        |
| Rapadocin 1a: $^1\text{H}$ - $^1\text{H}$ -COSY.....                                                | 27        |
| Rapadocin 1a: $^1\text{H}$ - $^{13}\text{C}$ -HSQC.....                                             | 28        |
| Compound 13: $^1\text{H}$ -NMR.....                                                                 | 29        |
| Compound 13: $^1\text{H}$ -NMR.....                                                                 | 30        |
| Compound 13: $^{13}\text{C}$ -NMR.....                                                              | 31        |
| Rapadocin 1b: $^1\text{H}$ -NMR.....                                                                | 32        |
| Rapadocin 1b: $^{13}\text{C}$ -NMR.....                                                             | 33        |
| <b>Comparison of the Spectra of Rapadocin isomers and Solid Phase Products.....</b>                 | <b>34</b> |
| <b>Chromatogram of HPLC of the Rapadocin isomers and MS of the HPLC peak.....</b>                   | <b>37</b> |
| <b>Chromatogram of HPLC of the 1c and 1d decomposed crude solution and MS of the HPLC peak.....</b> | <b>41</b> |
| <b>References.....</b>                                                                              | <b>43</b> |

## BIOLOGY:

### Biological Reagents

Swine kidney tubular epithelial cell line PK15, its derivatives PK15-ENT1 and PK15-ENT2 were provided by Dr. Chung-Ming Tse (Johns Hopkins University School of Medicine). Jurkat T cells were purchased from ATCC. Human red blood cells were obtained from Fisher Scientific (Cat#: 50-643-497). DMEM and RPMI-1640 medium were purchased from Fisher Scientific (Cat#: 11885092, Cat#: 11875119). [ $^3\text{H}$ ]-thymidine was purchased from PekinElmer (Cat#: NET027). Vectors pET-28a(+) and pDEST15 were purchased from Novagen and Invitrogen, respectively. Ni-NTA agarose beads was purchased from Qiagen (Cat#: 30210). Hi-prep Q anion-exchange column, glutathione beads and sephacryl S-100 beads were purchased from GE life sciences (Cat#: 17115301, 17075601, and 17061210). Streptavidin agarose beads and glutathione magnetic beads were purchased from ThermoFisher Scientific (Cat#: 20359 and 78601). Protein assay kit was purchased from Bio-Rad (Cat#: 5000006). Antibody ENT1 was purchased from Santa Cruz Biotechnology (Cat#: SC377283).

### Cell Culture

All cells were grown at 37°C with 5%  $\text{CO}_2$  in a humidified environment. PK15-ENT1 and PK15-ENT2 cells were grown in DMEM media with the addition of 10% FBS. Jurkat T cells were grown in RPMI-1640 media with the addition of 10% FBS.

### Proliferation Assay

15,000 Jurkat T wt or FKBP12 knockout cell/well was seeded in a 96-well plate (Costar) in 180  $\mu\text{L}$  media; PK15-ENT1 or PK15-ENT2 cells were seeded at 10,000 cells/well. After an overnight

recovery, drugs were added. Following a 30min incubation, cells were pulsed with 1  $\mu$ Ci of [ $^3$ H]-thymidine for 30min, washed once with PBS, trypsinized, and transferred to filtermats using a Mach III M Harvester 96 (Tomtec). After drying, [ $^3$ H]-thymidine retention on the filtermats was determined by scintillation counting using a 1450 Microbeta apparatus (Wallac). Counts were normalized to vehicle only treated cells. GraphPad Prism (v4.03) software was used to determine IC<sub>50</sub> values using a four-parameter logistic regression.

### **Overexpression and Purification of FKBP12 Protein**

The FKBP1A coding cDNA was inserted into either the pET-28a (+) vector between NdeI and XhoI for his-tag fusion protein or pDEST15 using Gateway cloning technology (Invitrogen) for GST fusion protein. The cloned genes were confirmed not to contain any spurious mutations by sequencing the full length of the cloned inserts. The gene products were then expressed under induction of 0.2 mM isopropyl- $\beta$ -D-thiogalactopyranoside (IPTG) for 4h at 37°C. The 6xHis-FKBP12 protein was purified from the crude extract prepared from the harvested cells, first by metal chelating chromatography using Ni-NTA agarose beads and then by a 5ml Hi-Prep Q anion-exchange column. The GST-FKBP12 protein was purified first by glutathione beads and then by size exclusion chromatography using sephacryl S-100 beads. Purified proteins were quantified by protein assay kit and stored at -20°C until used in PBS buffer (pH 7.4) plus 5 mM DTT and 10% glycerol.

### **Measurement of $K_d$ Values for Rapafucins**

Dissociation constant  $K_d$  values for rapafucins were determined with the fluorescence chemical denaturation assay as described previously<sup>1</sup>. Briefly, 1 $\mu$ M of purified FKBP12 protein bearing his-tag was incubated individually with 10 $\mu$ M of each rapafucins in 96-well plates and then equilibrated over a range of chemical denaturant concentrations (GuHCl, 0-4M). After an overnight incubation at RT, the fluorescence (ex 280nm / em 340nm) of FKBP12 or FKBP12-rapafucin-denaturant complexes was measured using a fluorescence plate reader, FLUOstar Optima (BMG Labtech, U.K.). Apparent  $K_d$  values for rapafucins were obtained using the data analysis method previously described<sup>1</sup>.

### **Extraction of ENT1 Protein from Red Blood Cells**

Human red blood cells were washed once in buffer A (10 mM Tris-HCl, 150 mM KCl, 5 mM MgCl<sub>2</sub>, 1 mM EGTA, pH 7.4), and membranes were prepared by dispersing 1 volume of cells in 24 ml ice cold buffer B (10 mM Tris-HCl, 1 mM EGTA, pH 7.4). After 10 min of incubation on ice, membranes were collected at 17,000 g for 10 min at 4°C. To extract Ent1 protein, membranes were mixed in buffer C (10 mM Tris-HCl, 150 mM KCl, 5 mM MgCl<sub>2</sub>, 1% OTG, 5% glycerol, 1 mM EGTA, protease inhibitor, pH 7.4) and incubated on ice for 2 h with frequent mixing. The supernatant was collected by centrifugation at 17,000 g for 10min at 4°C, and then diluted four-fold in buffer A plus 5% glycerol to reduce the concentration of OTG. The diluted supernatant was quantified by protein assay kit and placed on ice until use.

### **GST-FKBP12 Affinity Pull-down**

The supernatant containing extracted ENT1 protein was obtained from previous extraction step and pre-incubated with glutathione magnetic beads at 4°C for 30min to remove the endogenous



glutathione-binding proteins. The supernatant was collected by precipitation of beads on the magnet and diluted to 10mg/ml for pull-down experiment. For a typical GST-FKBP12 pull-down reaction, 300  $\mu$ L of supernatant was pretreated with 20  $\mu$ M of drugs or equal volume of DMSO (as noted in the text) for 30min, before the addition of 2 $\mu$ M of purified GST-FKBP12. After incubation at 4°C for 1h with frequent mixing, 30  $\mu$ L of glutathione-magnetic beads in buffer A plus 5% glycerol was added, and incubation was continued for 2h. The magnetic beads were precipitated on the magnet and washed three times with 0.8 ml of buffer A plus 5% glycerol and 0.05% OTG. The washed glutathione-magnetic beads was then resuspended in 50  $\mu$ L of 2 x SDS sample buffer, heated at 100°C for 5 min and centrifuged for 2 min. The supernatant was subjected to SDS-PAGE followed by western blot.

### **Western Blot Analysis**

Cell lysates or samples from pull-down experiment were subjected to SDS/ PAGE and then transferred to a nitrocellulose membrane. Membranes were first blocked in 5% (wt/vol) BSA in Tris-buffered saline plus 0.1% Tween 20 (TBST) at room temperature for 30min and incubated with primary antibodies at 4 °C for overnight. Membranes were then washed three times with TBST and incubated with secondary antibodies at room temperature for another 1 h. Membranes were washed with TBST three times again and incubated with ECL substrate for 1 min at room temperature. Pictures were captured using a GeneSys Image Station.

### **CRISPR-Cas9 Knockout Protocol**

To create knockout line, cells were transfected with CRISPR all-in-one plasmid (GeneCopoeia) containing transcripts for Cas9, guideRNA, and mCherry fluorescent protein. This was performed by electroporation of 10 million Jurkat T wild type cells in 400 $\mu$ L of FBS/antibiotic free RPMI 1640 and 10 $\mu$ g cDNA (0.4cm gap cuvette) at 250V and 950 $\mu$ F using a Bio-Rad Gene Pulser II. After 48h rest, cells were centrifuged, aspirated, and re-suspended in sorting buffer (1x PBS, 25mM HEPES, 1% FBS, 2% Penn-Strep). Cells were then sorted (single-cell) into three pre-filled 96-well plates (100 $\mu$ L of RPMI 1640 containing 10% FBS and 2% Penn-Strep) for mCherry fluorescence at 561nm. Single cell colonies were allowed to grow 1 week before addition of 100 $\mu$ L of RPMI 1640 containing 10%FBS and 1% Penn-Strep. After 2-3 weeks, visible colonies were transferred to T-25 flasks and grown to 10<sup>5</sup>cells/mL before western blot for expression.

## **CHEMISTRY:**

### **General Information**

All chemical reagents were purchased from commercial suppliers without further purification. Normal phase disposable flash columns RediSep®Rf for flash chromatography with Teledyne Isco CombiFlash Rf 200 were purchased from Teledyne Isco, Inc. Solvent was used extra dry over molecular sieve, stabilized, AcroSeal®. Compound 11 and Z-FKBD part were provided by Affinity Research Chemicals, Inc at Wilmington, DE USA. Yields refer to chromatographically homogeneous materials. Reactions were monitored by Thin Layer Chromatography TLC Silica gel 60 F<sub>254</sub> supplied by EMD Millipore visualized by UV or basic solution of KMnO<sub>4</sub>. Mass

spectrometry provided by Agilent 6120 Quadrupole LC/MS and the column for HPLC co-injections was Agilent SB-C18, 1.8 $\mu$ m, 2.1x50 mm, 827700-902, USWEY14619. NMR spectra were recorded on Bruker Avance III 500 MHz NMR spectrometer and calibrated by using TMS as internal standard for  $^1\text{H}$ -NMR (0 ppm) and  $\text{CDCl}_3$  for  $^{13}\text{C}$ -NMR (77.0 ppm). The following abbreviations were used to explain the multiplicities: s = singlet, d = doublet, t = triplet, q = quartet, b = broad, td = triple doublet, dt = double triplet, dq = double quartet, m = multiplet. High-resolution mass spectra (HRMS) were recorded on Waters Synapt G2-Si mass spectrometer using ESI (electrospray ionization).

#### LC-MS Analytical Protocol for Macrocycles

Analytical reversed-phase high-performance liquid chromatography (HPLC) was performed on a C-18 reverse phase HPLC column (5 $\mu$ m Luna, 0.46 cm  $\times$  25 cm). Separations were achieved using a linear gradient of 40%-95% buffer B in A (A = 0.1% formic acid in  $\text{H}_2\text{O}$ ; B = 0.1% formic acid in  $\text{CH}_3\text{CN}$ ) at a flow rate of 1 mL/min.

#### Screening for the diastereoselective synthesis of dipeptide **4**

To a mixture of Boc-Phg-OH (0.100 mmol, 25 mg, 1.0 equiv), **5** (0.100 mmol, 27 mg, 1.0 equiv), in flame-dried 10 mL-Schlenk tube, dry DMF (1.0 mL) was added under Ar balloon protection, and base (1.0 equiv) and coupling reagents were added. The mixture was stirred at specific temperature for 3h. The ratio was detected by crude  $^1\text{H}$ -NMR.

#### Experimental Procedures and Spectroscopic Data of the Synthesized Compounds

Synthesis of compound **4**:

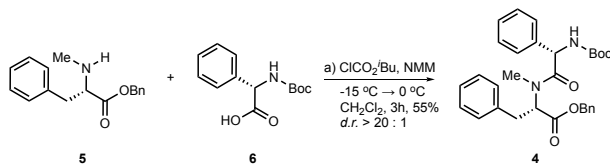

To a stirred solution of Boc-Phg-OH **6** (1.00 g, 4.0 mmol) and **5** (1.08 g, 4.0 mmol) in  $\text{CH}_2\text{Cl}_2$  (12 mL) was added N-Methylmorpholine (NMM, 0.52 mL, 4.8 mmol) followed by Isobutyl chloroformate (0.52 mL, 4.8 mmol) dropwise at  $-15^\circ\text{C}$ . After being stirred for 2 h, the resulting solution was quenched with a saturated solution of  $\text{NH}_4\text{Cl}$  (20mL). the reaction mixture was extracted three times with ethyl acetate (20 mL). The combined organic layers were washed with brine, dried over  $\text{Na}_2\text{SO}_4$ , filtered and concentrated under reduced pressure. The resulting residue was purified by CombiFlash on disposable flash columns RediSep<sup>®</sup>Rf (pure hexane to hexane/ethyl acetate = 9/1) to yield **4** (1.10 g, 2.2 mmol) as white amorphous solid;  $[\alpha]_{\text{D}}^{23} = +3.8$  ( $c = 1.0$  in  $\text{CH}_2\text{Cl}_2$ );  $^1\text{H}$  NMR (500 MHz,  $\text{CDCl}_3$ ) :  $\delta = 7.36\text{--}7.26$  (m, 8H), 7.22–7.13 (m, 5H), 7.05 (d,  $J = 7.1$  Hz, 2H), 6.50 and 5.90 (rotamers, d,  $J = 7.8$  Hz, 1H), 5.42 (d,  $J = 7.8$  Hz, 1H), 5.19 (dd,  $J = 9.9, 5.5$  Hz, 1H), 5.13 (d,  $J = 12.3$  Hz, 1H), 5.05 (d,  $J = 12.2$  Hz, 1H), 3.36(dd,  $J = 14.5, 5.5$  Hz, 1H), 3.00 (dd,  $J = 14.4, 10.1$  Hz, 1H), 2.66 (s, 3H), 1.39(s, 9H) ppm;  $^{13}\text{C}$  NMR (126 MHz,  $\text{CDCl}_3$ )  $\delta = 170.5, 170.1, 154.9, 137.2, 136.7, 135.4, 128.9, 128.8, 128.6, 128.3, 128.3, 128.2, 128.2, 127.9, 126.7, 79.7, 67.0, 59.8, 55.2, 34.5, 33.2, 28.4$  ppm; HRMS (ESI):  $m/z$  calcd for  $\text{C}_{30}\text{H}_{35}\text{N}_2\text{O}_5[\text{M} + \text{H}]^+$ : 503.2546, found 503.2545.

### Synthesis of compound **7**:

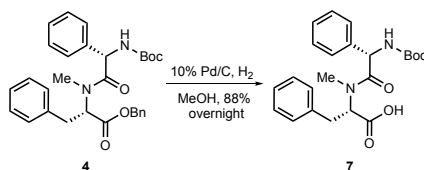

To a solution of compound **4** (357 mg, 0.71 mmol) in MeOH (5.0 mL) was added 10% Pd/C (50 mg, 0.02 equiv), and the resultant mixture was first degassed with hydrogen, and then stirred at room temperature for overnight. The reaction was quenched by filtration of the mixture through filter paper and washed with EtOAc (3 × 10 mL). The filtrate was concentrated under vacuum, and the residue was purified by CombiFlash on disposable flash columns RediSep® Rf (pure hexane to hexane/ethyl acetate = 4/1) to yield **7** (259 mg, 0.63 mmol) as white amorphous solid;  $[\alpha]_D^{23} = +5.3$  ( $c = 0.68$  in  $\text{CH}_2\text{Cl}_2$ );  $^1\text{H}$  NMR (500 MHz,  $\text{CDCl}_3$ ):  $\delta = 10.6$  (br s, 1H), 7.37-7.04 (m, 10H), 6.57 and 6.14 (rotamers, s, 1H), 5.53 (s, 1H), 5.14 (s, 1H), 3.37 (d,  $J = 13.9$  Hz, 1H), 3.03-2.96 (m, 1H), 2.71 (s, 3H), 1.38 (s, 9H) ppm;  $^{13}\text{C}$  NMR (126 MHz,  $\text{CDCl}_3$ )  $\delta = 173.6, 171.0, 155.0, 136.7, 136.6, 128.7, 128.6, 128.4, 128.1, 127.7, 126.5, 79.8, 59.8, 55.0, 34.0, 33.3, 28.2$  ppm; HRMS (ESI):  $m/z$  calcd for  $\text{C}_{23}\text{H}_{28}\text{N}_2\text{O}_5\text{Na}[\text{M} + \text{Na}]^+$ : 435.1896, found 435.1898.

### Synthesis of compound **8**:

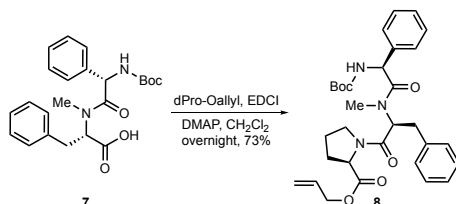

To a stirred solution of compound **7** (93 mg, 0.22 mmol) and dPro-Oallyl (42 mg, 0.27 mmol) in  $\text{CH}_2\text{Cl}_2$  (1.0 mL) was added DMAP (27 mg, 0.22 mmol) followed by EDCI (69 mg, 0.36 mmol) in a portion at room temperature and stirred for overnight. The reaction mixture was directly poured on disposable flash columns RediSep® Rf for further purification (pure hexane to hexane/ethyl acetate = 4/1) to yield **8** (88 mg, 0.16 mmol) as white amorphous solid;  $[\alpha]_D^{23} = +4.5$  ( $c = 1.04$  in  $\text{CH}_2\text{Cl}_2$ );  $^1\text{H}$  NMR (500 MHz,  $\text{CDCl}_3$ ):  $\delta = 7.39$ -7.18 (m, 10H), 5.95-5.79 (m, 2H), 5.54-5.17 (m, 4H), 4.50 (s, 2H), 4.31 (s, 1H), 3.33 (s, 1H), 3.08 (s, 1H), 3.00 (s, 3H), 2.87-2.77 (m, 2H), 2.00 (s, 1H), 1.76-1.52 (m, 3H), 1.41 (s, 9H) ppm;  $^{13}\text{C}$  NMR (126 MHz,  $\text{CDCl}_3$ )  $\delta = 171.1, 170.2, 167.4, 154.6, 137.1, 137.1, 131.5, 129.4, 128.6, 128.1, 128.0, 127.4, 126.3, 118.2, 79.4, 65.3, 58.6, 56.8, 54.8, 45.8, 34.8, 30.6, 28.5, 28.1, 24.4$  ppm; HRMS (ESI):  $m/z$  calcd for  $\text{C}_{31}\text{H}_{40}\text{N}_3\text{O}_6[\text{M} + \text{H}]^+$ : 550.2917, found 550.2919.

### Synthesis of compound **9**:

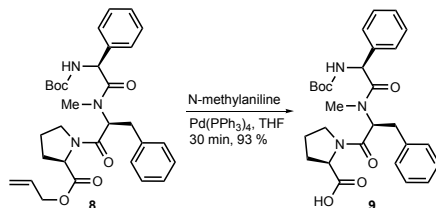

To a stirred solution of compound **8** (144 mg, 0.26 mmol) and N-methylaniline (0.28 mL, 2.6 mmol) in THF (3.0 mL) was added  $(\text{PPh}_3)_4\text{Pd}$  (30 mg, 0.026 mmol) in a portion, and the resultant

mixture was first degassed with Ar, and then stirred at room temperature for 30 minutes. The reaction was quenched with a solution of 1N HCl (5.0 mL). the reaction mixture was extracted two times with ethyl acetate (10 mL). The combined organic layers were washed with brine, dried over Na<sub>2</sub>SO<sub>4</sub>, filtered and concentrated under reduced pressure. The resulting residue was purified by CombiFlash on disposable flash columns RediSep® Rf (pure hexane to hexane/ethyl acetate = 4/1 to 3/2) to yield **9** (124 mg, 0.24 mmol) as white amorphous solid;  $[\alpha]_D^{23} = +54.9$  (c = 0.86 in CH<sub>2</sub>Cl<sub>2</sub>); <sup>1</sup>H NMR (500 MHz, CDCl<sub>3</sub>) :  $\delta$  = 9.75 (br s, 1H), 7.41-7.04 (m, 10H), 6.06 (s, 1H), 5.78 (s, 1H), 5.34 (s, 1H), 4.35 (s, 1H), 3.35 (t, *J* = 10.4 Hz, 1H), 3.08 (s, 3H), 2.98-2.80 (m, 2H), 2.66(s, 1H), 2.00-1.78 (m, 2H), 1.64-1.48 (m, 2H), 1.42 (s, 9H) ppm; <sup>13</sup>C NMR (126 MHz, CDCl<sub>3</sub>)  $\delta$  = 174.0, 170.7, 168.4, 155.0, 137.1, 137.1, 129.5, 128.7, 128.2, 128.2, 127.4, 126.5, 80.2, 58.7, 57.4, 54.4, 46.0, 34.9, 31.2, 28.3, 28.2, 24.5 ppm; HRMS (ESI): *m/z* calcd for C<sub>28</sub>H<sub>36</sub>N<sub>3</sub>O<sub>6</sub>[M + H]<sup>+</sup>: 510.2604, found 510.2600.

#### Synthesis of compound **10**:

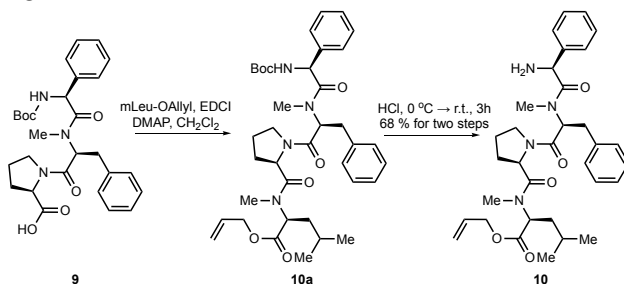

To a stirred solution of compound **9** (76 mg, 0.15 mmol) and mLeu-O-allyl (40 mg, 0.18 mmol) in CH<sub>2</sub>Cl<sub>2</sub> (1.0 mL) was added DMAP (18 mg, 0.15 mmol) followed by EDCI (46 mg, 0.24 mmol) in a portion at room temperature and stirred for 4h. The reaction mixture was directly poured on disposable flash columns RediSep® Rf for the further purification (pure hexane to hexane/ethyl acetate = 4/1 to 1/1) to yield **10a** (80 mg, 0.12 mmol) as white amorphous solid.

To a flame-dried flask was added **10a** (80 mg, 0.12 mmol), followed by the addition of HCl (1.0 mL, 4.0 M in dioxane) at 0 °C. After being stirred for 3 h, the reaction mixture was concentrated in vacuo. The residue was quenched with a saturated solution of NaHCO<sub>3</sub> (5.0 mL). the reaction mixture was extracted three times with ethyl acetate (5.0 mL). The combined organic layers were washed with brine, dried over Na<sub>2</sub>SO<sub>4</sub>, filtered and concentrated under reduced pressure. The resulting residue was purified by CombiFlash on disposable flash columns RediSep® Rf (pure CH<sub>2</sub>Cl<sub>2</sub> to CH<sub>2</sub>Cl<sub>2</sub>/(CH<sub>2</sub>Cl<sub>2</sub>/EtOH/MeOH = 2/2/1) = 9/1 to 7/3) to yield **10** (61 mg, 0.10 mmol) as white amorphous solid;  $[\alpha]_D^{23} = -52.2$  (c = 0.36 in CH<sub>2</sub>Cl<sub>2</sub>); <sup>1</sup>H NMR (500 MHz, CDCl<sub>3</sub>) :  $\delta$  = 7.35-7.17 (m, 10H), 5.94-5.82 (m, 1H), 5.60-5.48 (m, 1H), 5.37-5.17 (m, 2H), 4.97 and 4.72 (rotamers, dd, *J* = 9.4, 6.4 Hz, 1H), 4.66-4.55 (m, 3H), 3.42-2.77 (m, 10H), 2.20-1.39 (m, 10H), 1.02-0.86 (m, 6H) ppm; <sup>13</sup>C NMR (126 MHz, CDCl<sub>3</sub>)  $\delta$  = 173.2, 172.0, 171.1, 167.3, 140.2, 137.7, 131.9, 129.6, 128.9, 128.8, 128.1, 127.0, 126.7, 118.0, 65.4, 56.8, 56.2, 55.4, 46.2, 37.4, 34.9, 32.1, 30.6, 28.2, 24.9, 24.6, 23.1, 21.2 ppm; HRMS (ESI): *m/z* calcd for C<sub>33</sub>H<sub>45</sub>N<sub>4</sub>O<sub>5</sub>[M + H]<sup>+</sup>: 577.3390, found 577.3389.

#### Synthesis of compound **2**:

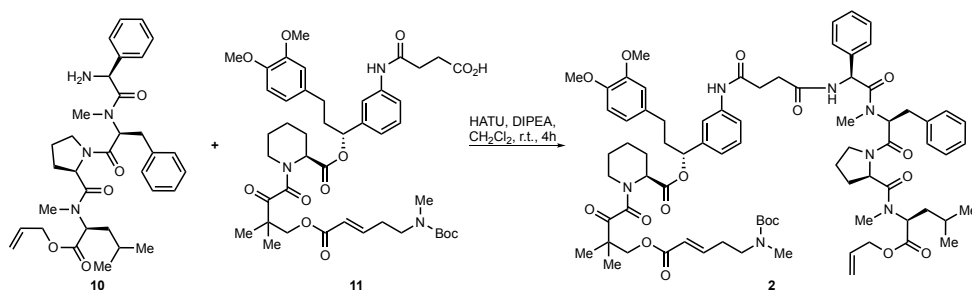

To a stirred solution of compound **10** (27 mg, 0.047 mmol) and compound **11** (39 mg, 0.047 mmol) in  $\text{CH}_2\text{Cl}_2$  (1.0 mL) was added DIPEA (24  $\mu\text{L}$ , 0.14 mmol) followed by HATU (27 mg, 0.070 mmol) in a portion at room temperature and stirred for 4h. The resulting solution was quenched with a saturated solution of  $\text{NH}_4\text{Cl}$  (3.0 mL). the reaction mixture was extracted three times with ethyl acetate (3.0 mL). The combined organic layers were washed with brine, dried over  $\text{Na}_2\text{SO}_4$ , filtered and concentrated under reduced pressure. The resulting residue was purified by CombiFlash on disposable flash columns RediSep<sup>®</sup> Rf (pure  $\text{CH}_2\text{Cl}_2$  to  $\text{CH}_2\text{Cl}_2/\text{EtOH}/\text{MeOH} = 2/2/1 = 17/3$ ) to yield **2** (61 mg, 0.043 mmol) as white amorphous solid;  $[\alpha]_{\text{D}}^{23} = -5.5$  ( $c = 0.53$  in  $\text{CH}_2\text{Cl}_2$ );  $^1\text{H}$  NMR (500 MHz,  $\text{CDCl}_3$ ):  $\delta = 8.64$  and  $8.58$  (rotamers, s, 1H),  $7.59$ - $7.31$  (m, 4H),  $7.30$ - $7.08$  (m, 10H),  $7.01$  (d,  $J = 7.4$  Hz, 1H),  $6.96$ - $6.86$  (m, 1H),  $6.80$ - $6.74$  (m, 1H),  $6.71$ - $6.65$  (m, 2H),  $5.93$ - $5.83$  (m, 1H),  $5.81$ - $5.75$  (m, 2H),  $5.48$ - $5.34$  (m, 1H),  $5.33$ - $5.07$  (m, 3H),  $4.97$  and  $4.69$  (rotamers, m, 1H),  $4.62$ - $4.55$  (m, 2H),  $4.35$ - $4.20$  (m, 2H),  $3.85$  (s, 3H),  $3.84$  (s, 3H),  $3.46$  (d,  $J = 13.8$  Hz, 1H),  $3.39$ - $3.23$  (m, 3H),  $3.18$ - $3.05$  (m, 3H),  $2.99$  (d,  $J = 5.8$  Hz, 3H),  $2.96$ - $2.77$  (m, 7H),  $2.65$ - $2.32$  (m, 9H),  $2.27$ - $2.17$  (m, 1H),  $2.12$ - $1.90$  (m, 3H),  $1.82$ - $1.55$  (m, 8H),  $1.50$ - $1.39$  (m, 11H),  $1.38$ - $1.23$  (m, 8H),  $1.02$ - $0.85$  (m, 6H) ppm;  $^{13}\text{C}$  NMR (126 MHz,  $\text{CDCl}_3$ )  $\delta = 205.2, 171.9, 171.1, 170.9, 170.3, 169.8, 169.3, 168.1, 167.0, 166.2, 165.5, 148.7, 147.2, 140.5, 138.7, 137.4, 136.4, 133.4, 131.8, 129.7, 129.5, 129.1, 129.0, 128.9, 128.8, 128.2, 128.1, 127.7, 126.4, 122.1, 120.0, 118.1, 111.6, 111.2, 68.9, 65.9, 65.7, 65.5(3), 65.5(1), 57.8, 57.2, 57.1, 56.9, 55.8, 55.7, 55.5, 53.9, 51.2, 46.6, 46.5, 46.2, 46.1, 44.0, 38.4, 37.4, 35.0, 32.5, 32.1, 28.3, 28.2, 27.7, 26.2, 24.9, 24.5, 23.2, 21.7, 21.2, 20.9$  ppm; HRMS (ESI):  $m/z$  calcd for  $\text{C}_{77}\text{H}_{102}\text{N}_7\text{O}_{17}[\text{M} + \text{H}]^+$ : 1396.7332, found 1396.7319.

#### Synthesis of rapadocin **1a**:

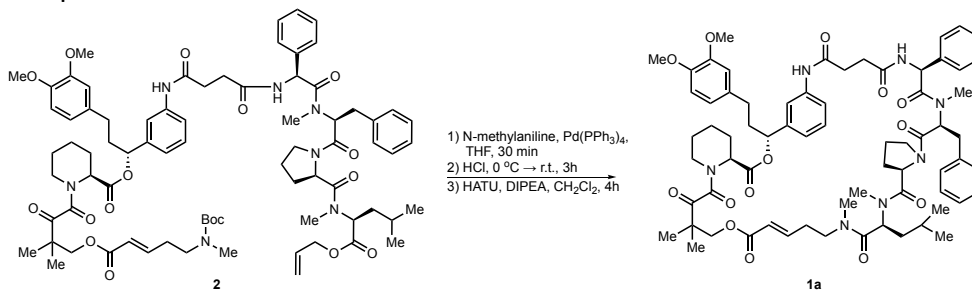

To a stirred solution of compound **2** (52 mg, 37.2  $\mu\text{mol}$ ) and N-methylaniline (40  $\mu\text{L}$ , 372  $\mu\text{mol}$ ) in THF (0.50 mL) was added  $(\text{PPh}_3)_4\text{Pd}$  (4.3 mg, 3.72  $\mu\text{mol}$ ) in a portion, and the resultant mixture was first degassed with Ar, and then stirred at room temperature for 30 minutes. The reaction was quenched with a solution of 1N HCl (3.0 mL). the reaction mixture was extracted two times with ethyl acetate (5 mL). The combined organic layers were washed with brine, dried over  $\text{Na}_2\text{SO}_4$ , filtered and concentrated under reduced pressure. The resulting residue was purified by

CombiFlash on disposable flash columns RediSep® Rf (pure CH<sub>2</sub>Cl<sub>2</sub> to CH<sub>2</sub>Cl<sub>2</sub>/ (CH<sub>2</sub>Cl<sub>2</sub>/EtOH/MeOH = 2/2/1) = 17/3) to get white amorphous solid (30.2 mg, 22.3 μmol);

To a flame-dried flask was added previous product (30.2 mg, 22.3 μmol), followed by the addition of HCl (1.0 mL, 4.0 M in dioxane) at 0 °C. After being stirred for 3 h, the reaction mixture was concentrated in vacuo and directly move to the next step.

To a stirred solution of previous product (22.3 μmol) in CH<sub>2</sub>Cl<sub>2</sub> (0.5 mL) was added DIPEA (11 μL, 66.9 μmol) followed by HATU (12 mg, 44.6 μmol) in a portion at room temperature and stirred for 4h. The resulting solution was quenched with a saturated solution of NH<sub>4</sub>Cl (3.0 mL). the reaction mixture was extracted three times with ethyl acetate (3.0 mL). The combined organic layers were washed with brine, dried over Na<sub>2</sub>SO<sub>4</sub>, filtered and concentrated under reduced pressure. The resulting residue was purified by CombiFlash on disposable flash columns RediSep® Rf (pure CH<sub>2</sub>Cl<sub>2</sub> to CH<sub>2</sub>Cl<sub>2</sub>/ (CH<sub>2</sub>Cl<sub>2</sub>/EtOH/MeOH = 2/2/1) = 17/3) to yield **1a** ( 26.6 mg, 21.5 μmol) as white amorphous solid;  $[\alpha]_D^{23} = -36.5$  (c = 0.94 in CH<sub>2</sub>Cl<sub>2</sub>); <sup>1</sup>H NMR (500 MHz, CDCl<sub>3</sub>) : δ = 8.97-8.91 and 7.93-7.73 (rotamers, m, 1H), 7.46-7.29 (m, 4H), 7.25-7.14 (m, 6H), 7.12-6.84 (m, 3H), 6.81-6.75 (m, 1H), 6.71-6.63 (m, 2H), 6.03-5.73 (m, 3H), 5.47-5.12 (m, 3H), 4.66-4.47 (m, 1H), 4.46-4.16(m, 2H), 3.86-3.85 (m, 6H), 3.75-3.56 (m, 1H), 3.46-3.35(m,1H), 3.30-3.10 (m, 3H), 3.06-2.82 (m, 9H), 2.80- 2.44 (m,9H), 2.40-2.17 (m, 3H), 2.12-1.91 (m, 2H), 1.89-1.38 (m, 14H), 1.37-1.18 (m, 7H), 0.92-0.87 (m, 6H) ppm; <sup>13</sup>C NMR (126 MHz, CDCl<sub>3</sub>) δ = 204.8, 171.1, 170.9, 170.6, 169.9, 169.7, 169.4, 167.5, 167.0, 166.0, 148.8, 147.3, 147.0, 145.8, 141.7, 138.9, 137.6, 136.6, 133.4, 129.6, 129.1, 128.9, 128.3, 128.2, 127.6, 127.5, 122.5, 122.3, 120.1, 117.0, 111.6, 111.2, 76.4, 69.3, 57.4, 55.9, 54.0, 53.6, 51.3, 50.2, 47.5, 46.9, 46.7, 46.3, 44.7, 44.1, 38.2, 37.7, 34.7, 34.1, 33.8, 31.2, 31.1, 30.3, 29.8, 29.6, 28.1, 25.0, 24.6, 23.0, 22.6, 21.7, 21.6, 21.0, 20.8 ppm; HRMS (ESI): m/z calcd for C<sub>69</sub>H<sub>88</sub>N<sub>7</sub>O<sub>14</sub>[M + H]<sup>+</sup>: 1238.6389, found 1238.6364.

#### Synthesis of compound **13**:

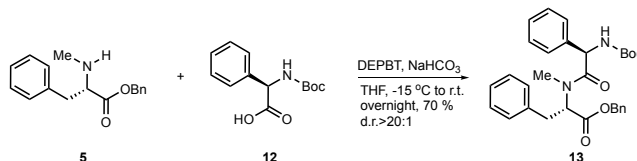

To a stirred solution of Boc-dPhg-OH **12** (1.35 g, 5.0 mmol) and **5** (1.88 g, 7.5 mmol) in THF (30 mL) was added NaHCO<sub>3</sub> (420 mg, 5.0 mmol) followed by DEPBT (2.39 g, 8.0 mmol) in a portion at -15 °C. After being stirred for overnight and warmed to room temperature, the resulting solution was quenched with a saturated solution of NH<sub>4</sub>Cl (40mL). the reaction mixture was extracted three times with ethyl acetate (50 mL). The combined organic layers were washed with brine, dried over Na<sub>2</sub>SO<sub>4</sub>, filtered and concentrated under reduced pressure. The resulting residue was purified by CombiFlash on disposable flash columns RediSep® Rf (pure hexane to hexane/ethyl acetate = 9/1) to yield **13** (1.75 g, 3.5 mmol) as white amorphous solid;  $[\alpha]_D^{23} = -100.2$  (c = 2.83 in CH<sub>2</sub>Cl<sub>2</sub>); <sup>1</sup>H NMR (500 MHz, CDCl<sub>3</sub>) : δ = 7.40-7.28 (m, 5H), 7.25-7.05 (m, 8H), 6.94 (d, J = 6.4 Hz, 2H), 5.88 ( d, J = 6.4 Hz, 1H), 5.47 (d, J = 7.9 Hz, 1H), 5.36 (dd, J = 10.7 Hz, 4.0 Hz, 1H), 5.20 (s, 2H), 3.37 (d, J = 14.4 Hz, 1H), 3.00-2.90 (m, 1H), 2.63 (s, 3H), 1.40 (s, 9H) ppm; <sup>13</sup>C NMR (126 MHz, CDCl<sub>3</sub>) δ = 170.9, 170.2, 155.0, 137.2, 136.5, 135.4, 128.9, 128.7, 128.4, 128.3, 127.8, 127.6, 126.8, 79.7, 67.2, 59.3, 55.6, 34.6, 32.9, 28.4 ppm; HRMS (ESI): m/z calcd for C<sub>30</sub>H<sub>35</sub>N<sub>2</sub>O<sub>5</sub>[M + H]<sup>+</sup>: 503.2546, found 503.2555.

#### Synthesis of rapadocin **1b**:

Compound **1b** was synthesized according to the procedures for the synthesis of **1a**.

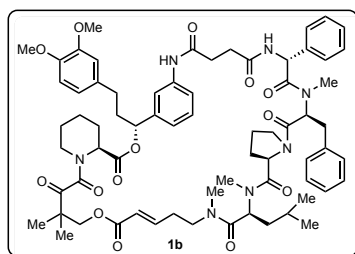

$[\alpha]_D^{23} = -71.3$  ( $c = 1.04$  in  $\text{CH}_2\text{Cl}_2$ );  $^1\text{H}$  NMR (500 MHz,  $\text{CDCl}_3$ ):  $\delta = 8.49\text{--}8.41$  and  $7.85\text{--}7.51$  (rotamers, m, 1H),  $7.30\text{--}7.01$  (m, 9H),  $6.99\text{--}6.75$  (m, 5H),  $6.70\text{--}6.64$  (m, 2H),  $5.89\text{--}5.64$  (m, 3H),  $5.44\text{--}5.12$  (m, 2H),  $4.82\text{--}4.61$  (m, 1H),  $4.44\text{--}3.96$  (m, 1H),  $3.86\text{--}3.84$  (m, 6H),  $3.78\text{--}3.64$  (m, 1H),  $3.60\text{--}3.27$  (m, 3H),  $3.23\text{--}2.58$  (m, 16H),  $2.54\text{--}2.00$  (m, 11H),  $1.93\text{--}1.53$  (m, 7H),  $1.51\text{--}1.12$  (m, 13H),  $0.92\text{--}0.84$  (m, 6H) ppm;  $^{13}\text{C}$  NMR (126 MHz,  $\text{CDCl}_3$ )  $\delta = 204.0, 171.8, 171.4, 170.9, 170.3, 169.8, 169.6, 167.8, 166.5, 166.1, 148.8(4), 148.8(1), 147.3, 140.5, 138.9, 136.4, 133.4, 129.2, 129.1(6), 129.1(1), 129.0, 128.9, 128.4, 128.0, 127.5, 126.6, 122.7, 122.5, 121.8, 120.1, 111.6, 111.3, 76.2, 69.6, 69.3, 68.8, 60.4, 57.3, 55.9, 55.8, 53.9, 51.8, 51.5, 51.2, 47.4, 47.1, 46.6, 44.0, 38.2, 37.8, 34.9, 34.6, 33.7, 31.2, 30.2, 29.6, 28.4, 25.0, 24.7, 23.1, 22.2, 21.6, 21.3, 21.1, 14.1$  ppm; HRMS (ESI):  $m/z$  calcd for  $\text{C}_{69}\text{H}_{88}\text{N}_7\text{O}_{14}[\text{M} + \text{H}]^+$ : 1238.6389, found 1238.6392.

#### Synthesis of rapadocin **1c**:

Compound **1c** was synthesized according to the procedures for the synthesis of **1a**. However, the yield of cyclization step is low (about 5% after flash column, PTLC and HPLC purification), which means the Z configuration of the double bond is highly unfavorable for the conformation of rapafucins family molecules. Due to the low yield, we only collected  $^1\text{H}$  NMR and HRMS. HRMS (ESI):  $m/z$  calcd for  $\text{C}_{69}\text{H}_{88}\text{N}_7\text{O}_{14}[\text{M} + \text{H}]^+$ : 1238.6389, found 1238.6360.

#### Synthesis of rapadocin **1d**:

Compound **1d** was synthesized according to the procedures for the synthesis of **1b**. However, the yield of cyclization step is low (about 5%) after flash column, PTLC and HPLC purification, which means the Z configuration of the double bond is highly unfavorable for the conformation of rapafucins family molecules. Due to the low yield, we only collect  $^1\text{H}$  NMR and HRMS. HRMS (ESI):  $m/z$  calcd for  $\text{C}_{69}\text{H}_{88}\text{N}_7\text{O}_{14}[\text{M} + \text{H}]^+$ : 1238.6389, found 1238.6379.

#### Synthesis of rapadocin **1a** from RCM strategy:

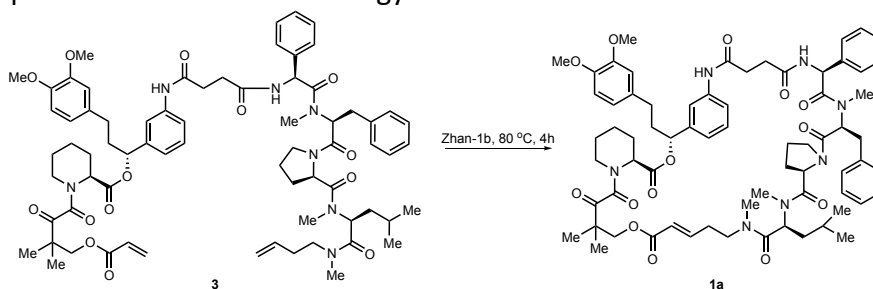

Compound **3** was synthesized according to the procedures for the synthesis of **2**. To a solution of compound **3** (25.0 mg, 20.0  $\mu\text{mol}$ ) in 1,2-dichloroethane (1.0 mL) was added Zhan-1b (2.5 mg, 4.0  $\mu\text{mol}$ ) catalyst, and the resultant mixture was stirred at 80  $^\circ\text{C}$  for 4h. The reaction mixture was directly poured on disposable flash columns RediSep<sup>®</sup> Rf for the further purification (pure  $\text{CH}_2\text{Cl}_2$  to  $\text{CH}_2\text{Cl}_2/(\text{CH}_2\text{Cl}_2/\text{EtOH}/\text{MeOH} = 2/2/1) = 17/3$ ) to yield **1a** (18.1 mg, 14.6  $\mu\text{mol}$ ) as white amorphous solid;  $[\alpha]_D^{23} = -35.9$  ( $c = 0.59$  in  $\text{CH}_2\text{Cl}_2$ ); HRMS (ESI):  $m/z$  calcd for  $\text{C}_{69}\text{H}_{88}\text{N}_7\text{O}_{14}[\text{M} + \text{H}]^+$ : 1238.6389, found 1238.6377.

# Spectra of the synthesized compounds

## Compound 4: <sup>1</sup>H-NMR

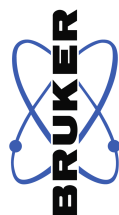

Current Data Parameters  
 EXPNO 2018-11-06-101-Boc-PNg-mPhe-  
 F2 - Acquisition Parameters  
 F2 - Acquisition Parameters  
 Name 2018-11-06-101-Boc-PNg-mPhe-  
 Time 15.28 h  
 Date\_ 2018-11-06  
 Time 15.28 h  
 PULPROG zgpg30  
 SOLVENT CDCl3  
 NS 32  
 SWH 10302.198 Hz  
 FIDRES 0.316608 Hz  
 AQRES 3.018608 Hz  
 RG 50.8  
 DD 48.550 usec  
 DE 6.250 usec  
 TE 300.2 K  
 TD0 1.00000001 sec  
 SFO1 499.803065 MHz  
 P1 11.53 usec  
 PL1 14.0000000 W  
 F2 - Processing parameters  
 SF 499.803065 MHz  
 WDW EM  
 GB 0  
 DB 0  
 PC 1.00

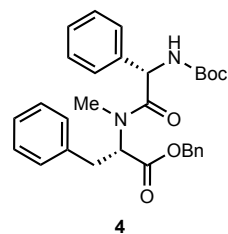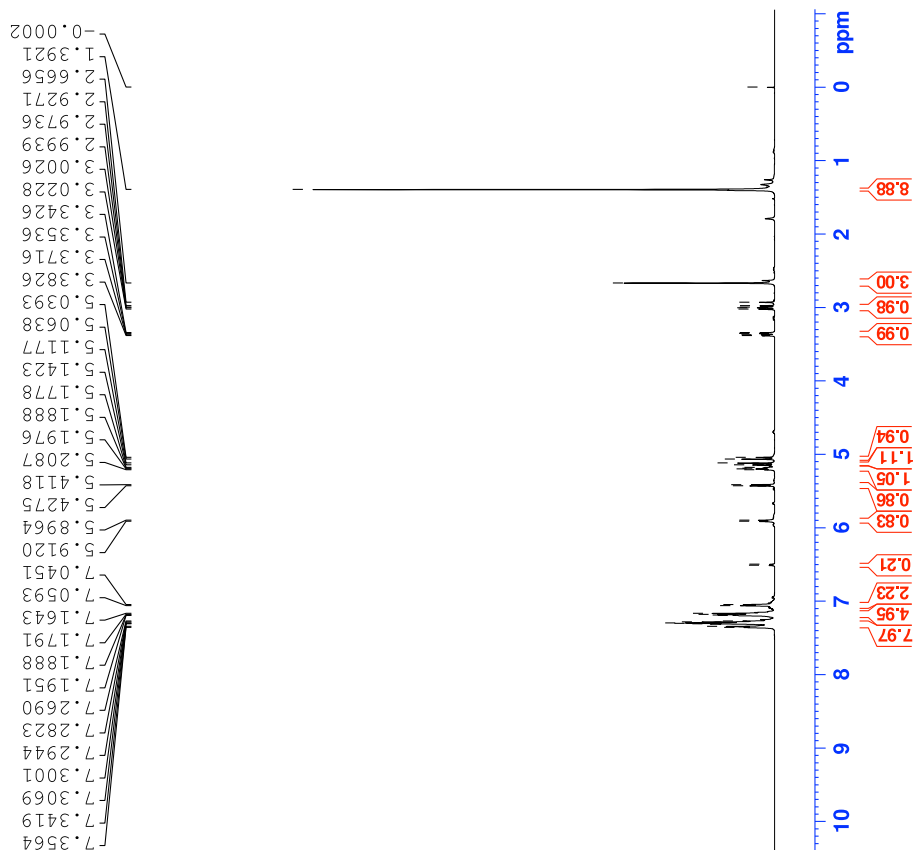



# Compound 4: <sup>1</sup>H-NMR

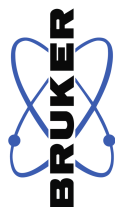

Current Data Parameters  
 Date\_ 2014-05-26  
 Time\_ 14:02:56  
 File\_ 20140526\_140256\_1  
 F2 - Processing Parameters  
 Date\_ 2014-05-26  
 Time\_ 14:02:56  
 File\_ 20140526\_140256\_1  
 F2 - Processing Parameters  
 Date\_ 2014-05-26  
 Time\_ 14:02:56  
 File\_ 20140526\_140256\_1

5.476  
 5.459  
 5.425  
 5.410

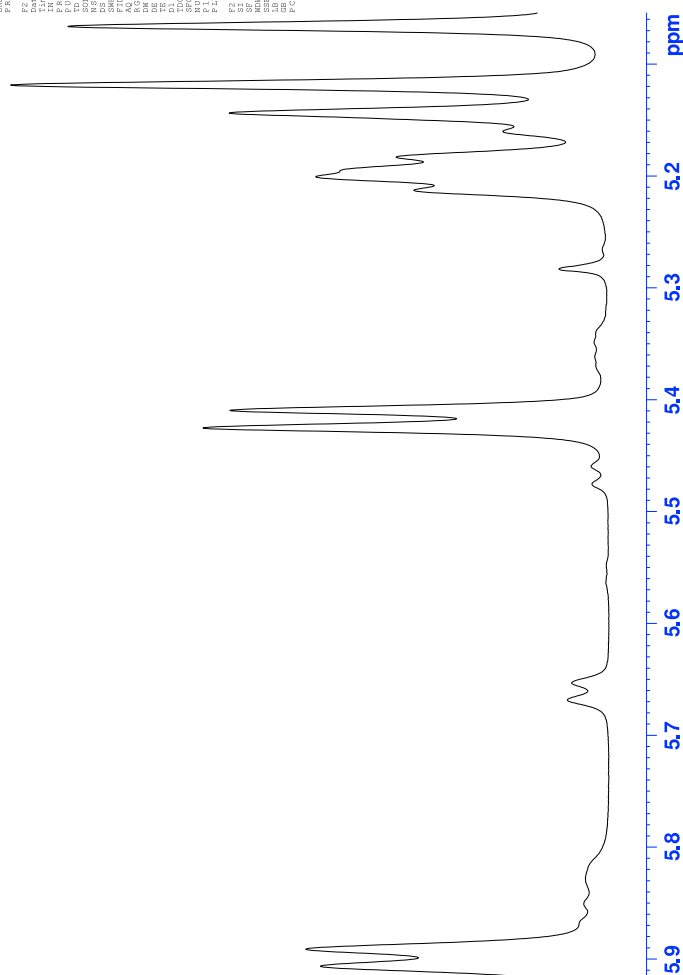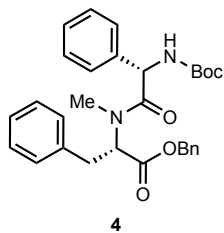

# Compound 4: <sup>13</sup>C-NMR

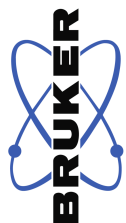

Current Data Parameters  
 EXPNO 2  
 PROCNO 1  
 F2 - Acquisition Parameters  
 Date\_ 20181106  
 INSTRUM spect h  
 PULPROG zgpg30  
 TD 65536  
 SOLVENT CDCl<sub>3</sub>  
 NS 512  
 DS 4  
 SWH 28761.84 Hz  
 FIDRES 1.1010048 sec  
 AQ 16.800 usec  
 DE 2.50 usec  
 CHST2 145.000000 K  
 CHST11 1.000000 sec  
 D20 0.00689655 sec  
 F201 125.687374 MHz  
 NUC1 <sup>13</sup>C  
 P2 1.50 usec  
 PL1 53.0000000 W  
 PL2 499.801937 Hz  
 NDC2  
 CDPRG2 waltz16  
 PL12 14.0000000 usec  
 PL12 0.28878999 W  
 F2 - Processing parameters  
 SI 32768  
 WDW EM  
 SSB 0  
 GB 0  
 PC 1.40

170.55  
 170.13  
 154.91  
 137.24  
 136.75  
 135.39  
 128.92  
 128.85  
 128.57  
 128.33  
 128.26  
 128.23  
 127.95  
 126.74  
 79.67  
 77.36  
 77.11  
 76.85  
 67.04  
 59.84  
 55.28  
 34.49  
 33.18  
 28.37

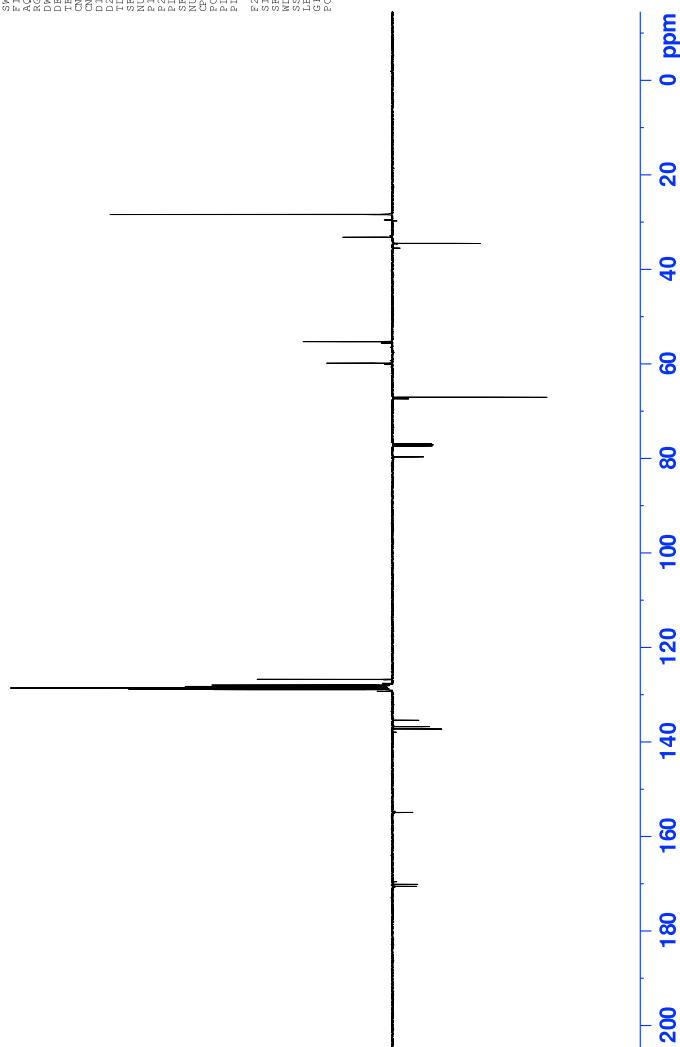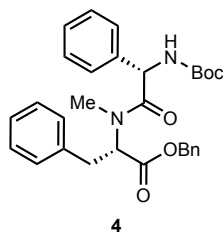



### Compound 7: $^{13}\text{C}$ -NMR

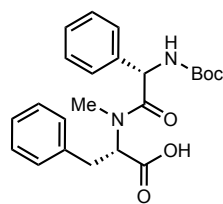

7

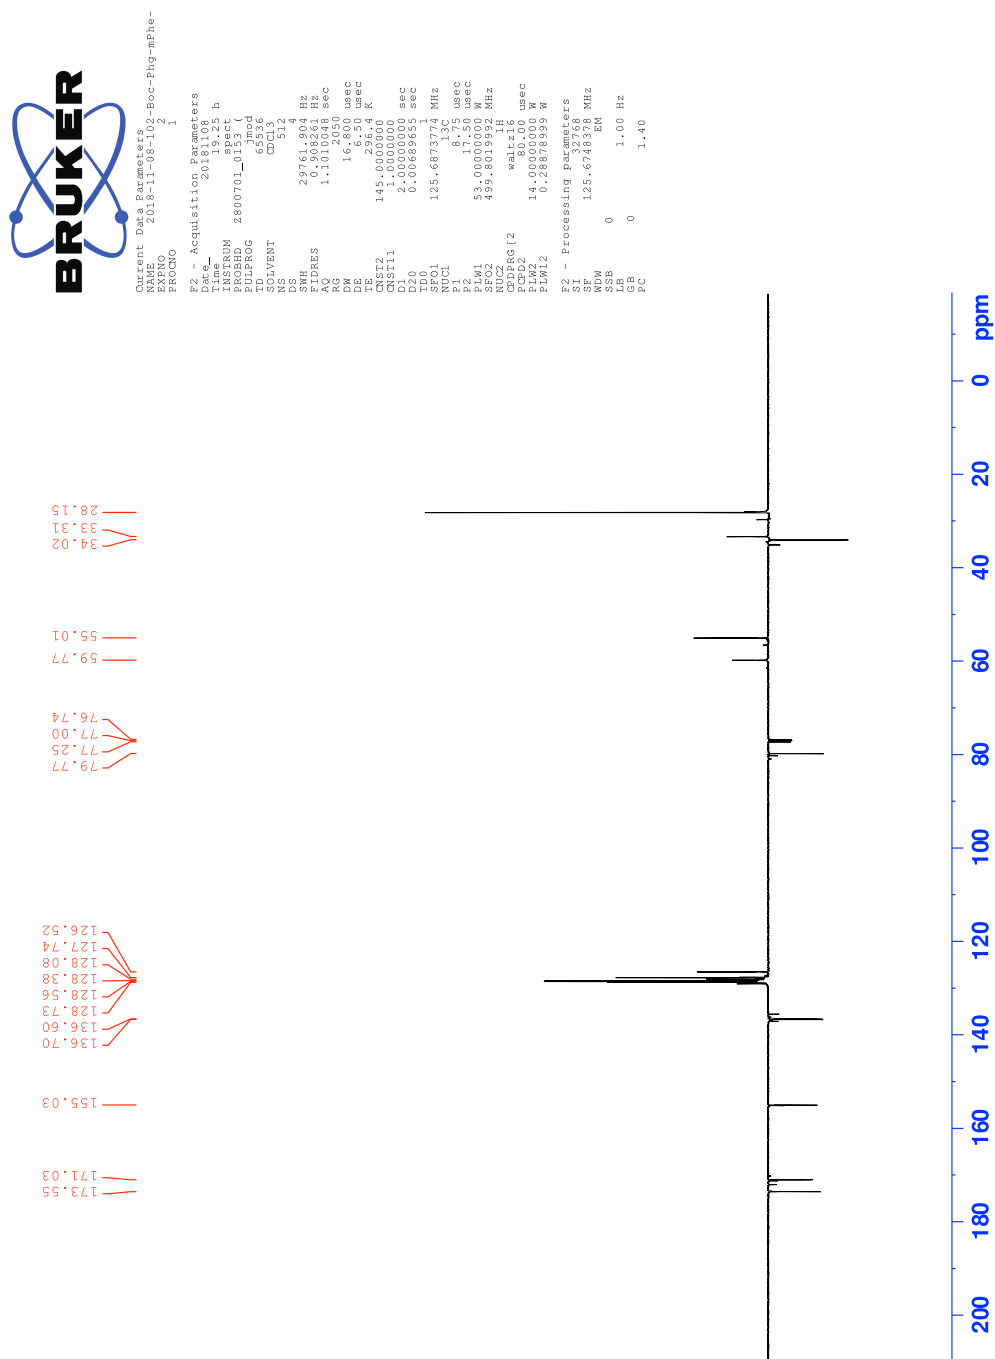

# Compound 8: <sup>1</sup>H-NMR

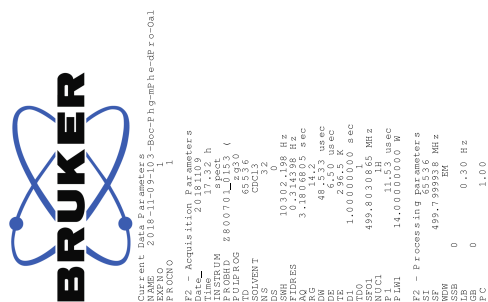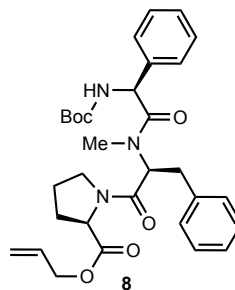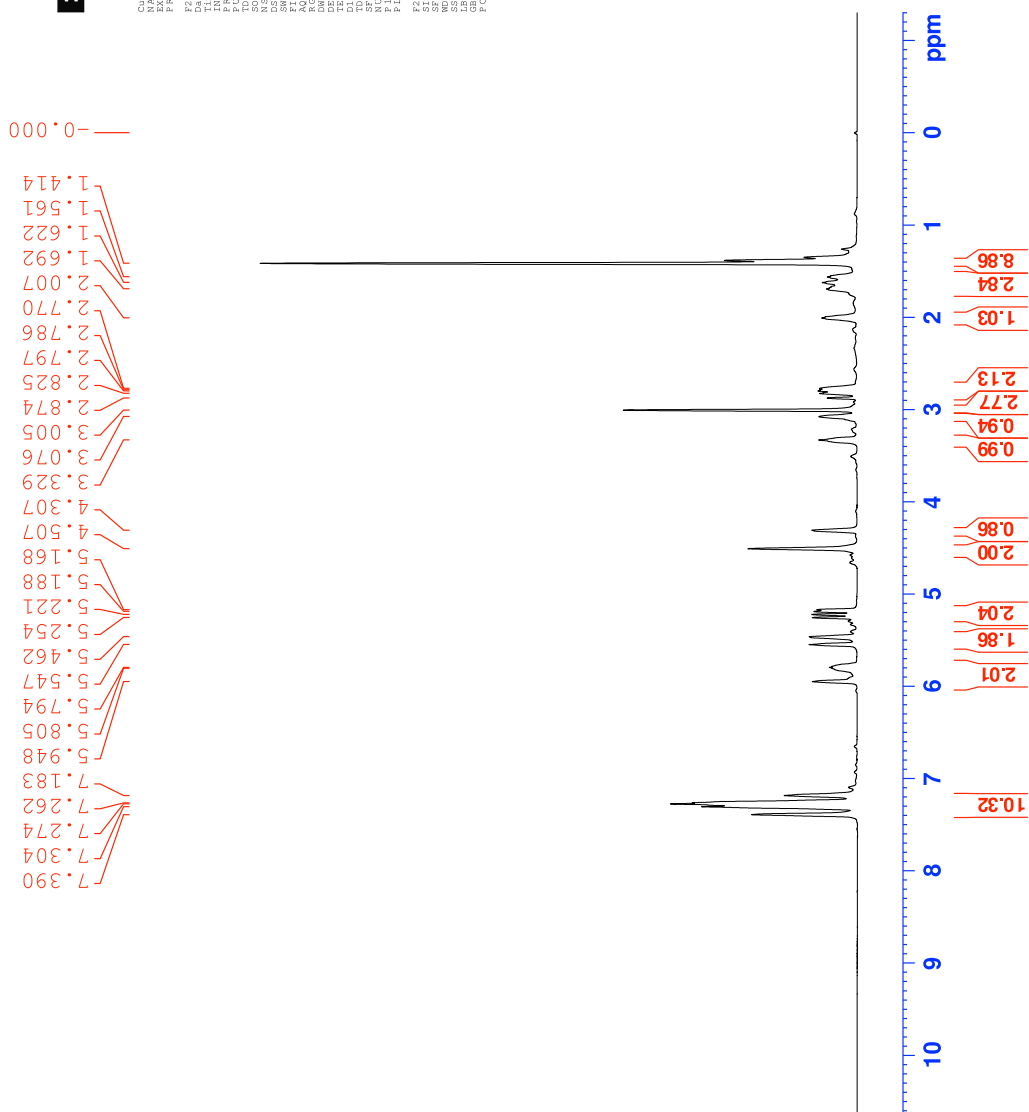

### Compound 8: $^{13}\text{C}$ -NMR

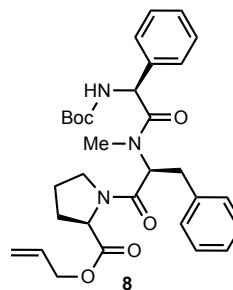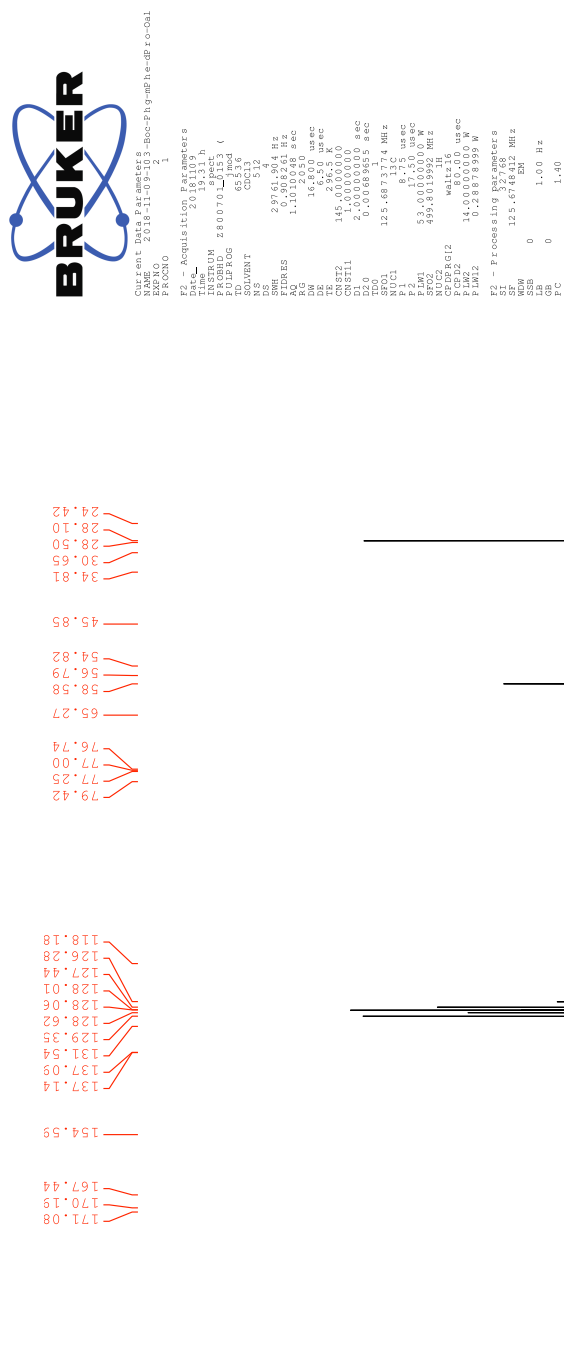

# Compound 9: <sup>1</sup>H-NMR

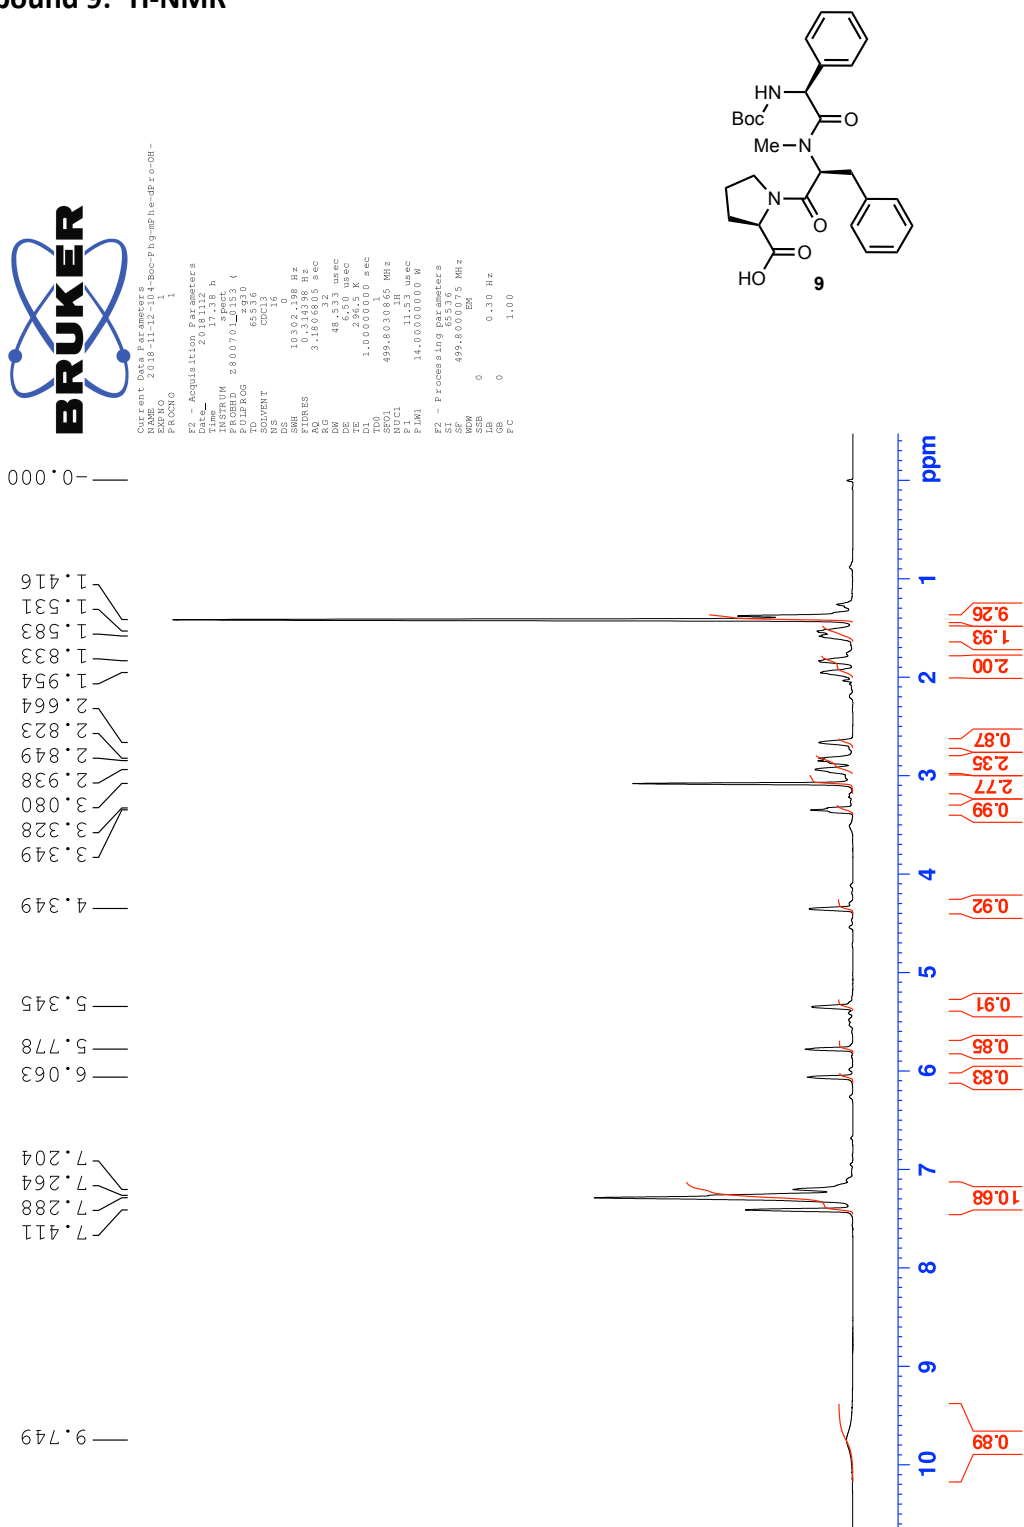

### Compound 9: $^{13}\text{C}$ -NMR

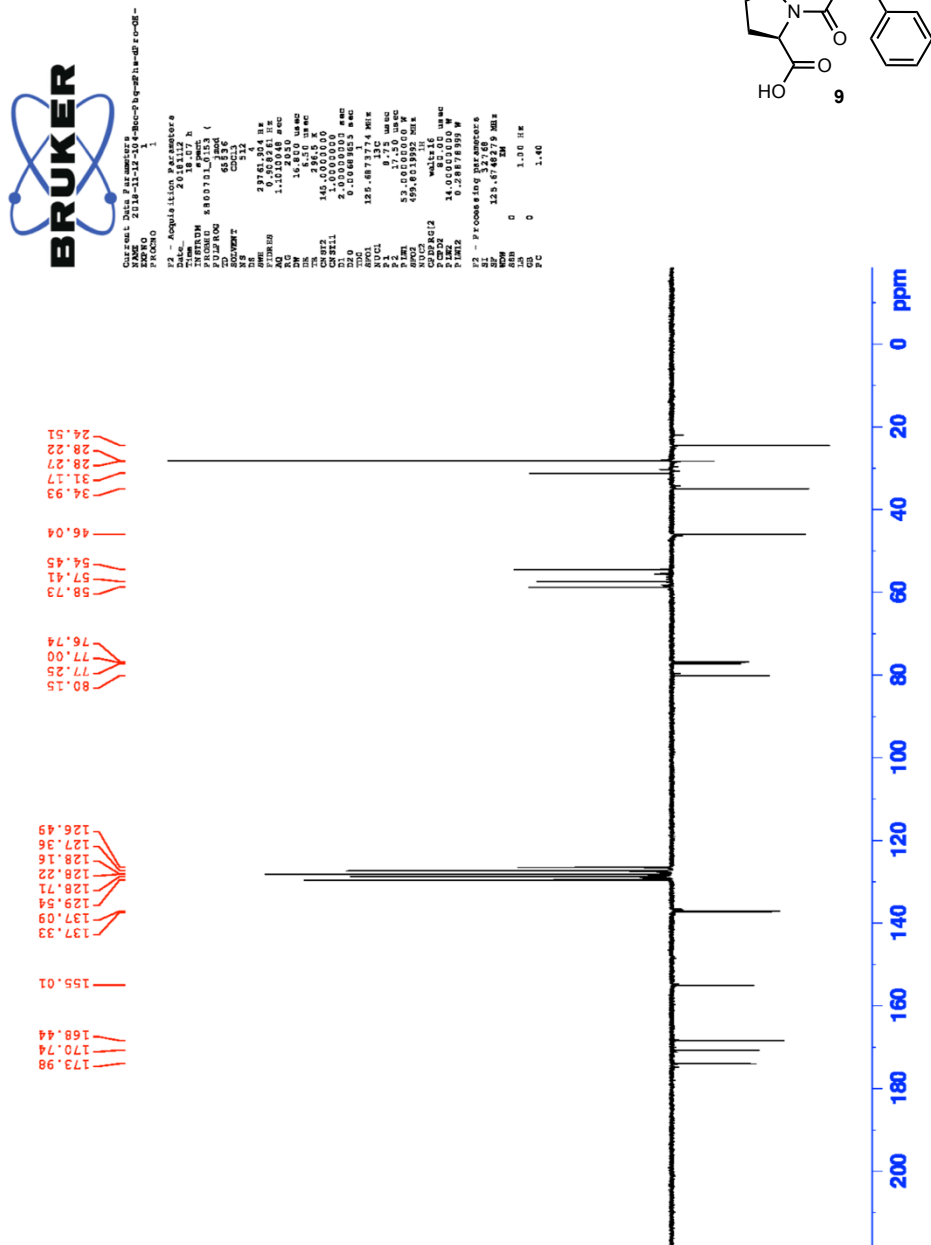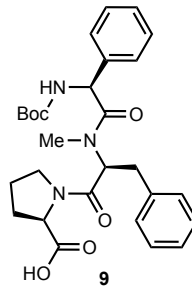



# Compound 10: <sup>1</sup>H-NMR

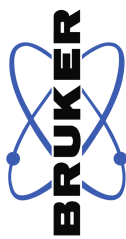

7.350  
7.336  
7.295  
7.290  
7.275  
7.219  
7.210  
7.196  
7.193  
7.179  
5.584  
5.300  
5.297  
5.218  
5.197  
4.660  
4.588  
4.586  
4.577  
4.574  
3.174  
3.014  
3.007  
2.962  
2.947  
2.839  
2.810  
2.084  
1.723  
1.715  
1.711  
1.650  
1.637  
1.021  
1.009  
0.993  
0.980  
0.953  
0.939  
0.918  
0.905  
0.873  
0.860

Current: 10.000 MHz  
Date: 2018-11-15 10:25:10  
EXPNO: 2  
PROCNO: 1  
F2 - Processing parameters  
SI: 65536  
SF: 499.8000000 MHz  
WDW: EM  
SSB: 0  
GB: 0  
PC: 1.00

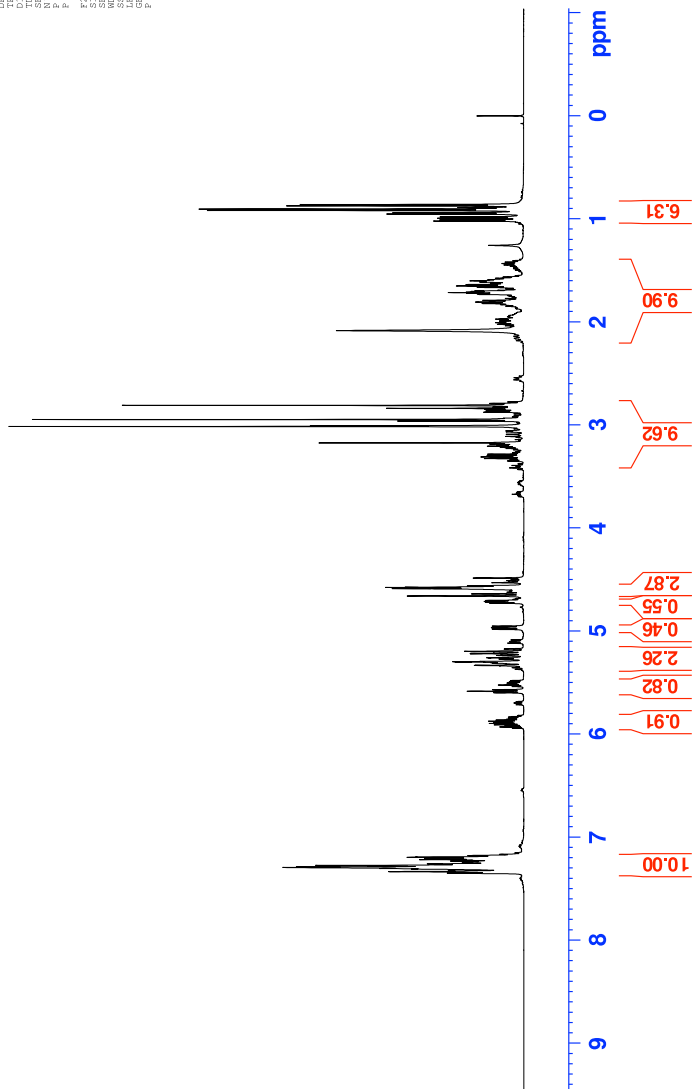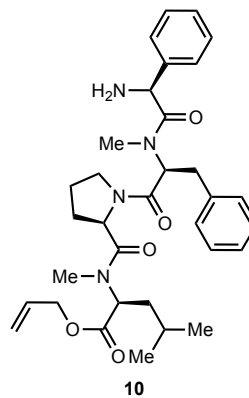



# Compound 2: <sup>1</sup>H-NMR

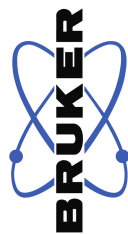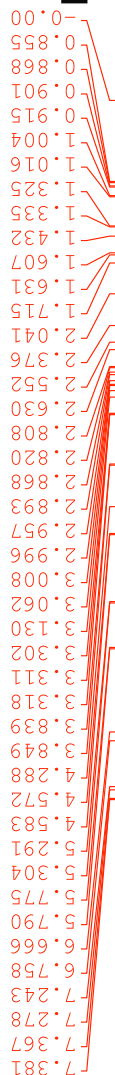

Current Data Parameters  
 NAME 2018-11-16-107-E-Boc-aFKBD  
 EXPNO 1  
 PROCNO 1

F2 - Acquisition Parameters

Date\_ 20181117  
 Time 4.51 h  
 INSTRUM spect  
 PROBHD zg30  
 PULPROG zg30  
 TD 65536  
 SOLVENT CDCl3  
 NS 32  
 DS 0  
 SWH 10302.198 Hz  
 FIDRES 0.314398 Hz  
 AQ 3.1806805 sec  
 RG 50.8  
 DW 48.533 usec  
 DE 6.50 usec  
 TE 296.4 K  
 D1 1.00000000 sec  
 TD0 1  
 SFOL 499.8030865 MHz  
 NUC1 1H  
 P1 11.53 usec  
 PLW1 14.00000000 W

F2 - Processing parameters

SI 65536  
 SF 499.800031 MHz  
 EM  
 WDW 0  
 SSB 0  
 LB 0.30 Hz  
 GB  
 PC 1.00

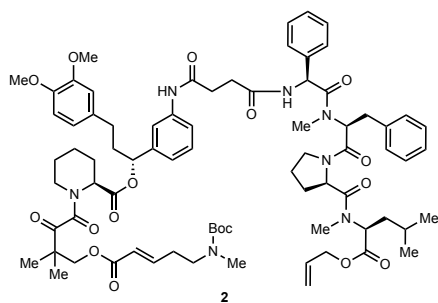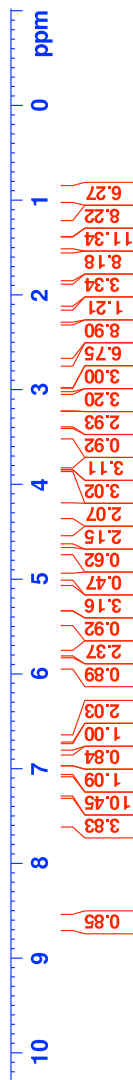

# Compound 2: <sup>13</sup>C-NMR

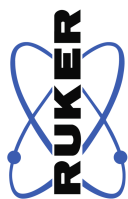

205.18  
171.88  
171.11  
170.91  
170.33  
169.76  
169.31  
168.07  
167.00  
166.22  
165.54  
148.74  
147.17  
140.50  
138.68  
137.41  
136.41  
133.42  
131.86  
129.67  
129.47  
129.05  
129.01  
128.91  
128.85  
128.15  
128.05  
127.68  
126.39  
122.08  
120.07  
111.63  
111.39  
68.99  
65.92  
65.75  
57.85  
57.16  
57.11  
56.89  
55.81  
55.73  
55.46  
55.38  
51.23  
46.61  
46.52  
46.22  
46.17  
43.95  
38.46  
37.41  
34.96  
32.50  
32.07  
28.28  
28.25  
27.72  
26.22  
24.93  
24.50  
23.19  
21.21  
20.26

Current Data Parameters  
NAME 2018-11-16-107-E-Boc-aFKED-Phg-mPh.  
EXPNO 1  
PROCNO 1

F2 - Acquisition Parameters

Date\_ 20181116  
Time 13:45  
INSTRUM spect  
PROBHD 2800701.0153 (1H  
PULPROG jmod  
TD 65536  
SOLVENT CDCl3  
NS 10000  
DS 4  
SWH 29761.904 Hz  
FIDRES 0.000821 Hz  
AQ 1.1010048 sec  
RG 2050  
DE 16.800 usec  
TE 296.4 K  
CNS12 145.000000  
CNS11 1.000000  
D1 2.0000000 sec  
D2 0.00689635 sec  
TD0  
SF01 125.6873774 MHz  
NUC1 13C  
P1 8.75 usec  
P2 17.50 usec  
SFO2 53.0000000 W  
499.8019992 MHz  
NUC2 1H  
PCPG12 waltz16  
PCPG13  
PLW2 14.0000000 W  
PLW12 0.2887899 W

F2 - Processing parameters

SI 32768  
SF 125.6748222 MHz  
WDW EM  
SSB 0  
GB 0  
PC 1.40

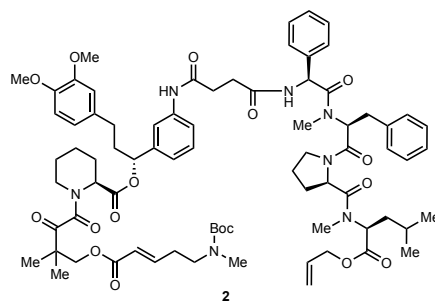

200 180 160 140 120 100 80 60 40 20 0 ppm

# Rapadocin 1a: <sup>1</sup>H-NMR

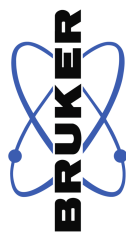

Current Data Parameters  
 NAME 2016-11-22-109-JW95-  
 PROCNO 1  
 F2 - Acquisition Parameters

Date\_ 20181122  
 Time 17.13 h  
 INSTRUM spect  
 PROBD Z800701\_0153 (   
 PULPROG zg30  
 TD 65536  
 SOLVENT CDCl3  
 NS 32  
 DS 0  
 SWH 10302.198 Hz  
 FIDRES 0.314398 Hz  
 AQ 3.1806805 sec  
 RG 144  
 DW 48.533 usec  
 DE 26.50 usec  
 TE 296.4 K  
 D1 1.0000000 sec  
 TD0 1  
 SF01 499.8030865 MHz  
 NUC1 1H  
 P1 11.53 usec  
 PLW1 14.0000000 W

F2 - Processing parameters  
 SI 65536  
 SF 499.8000096 MHz  
 EM  
 WDW EM  
 SSB 0  
 LB 0.30 Hz  
 GB 0  
 PC 1.00

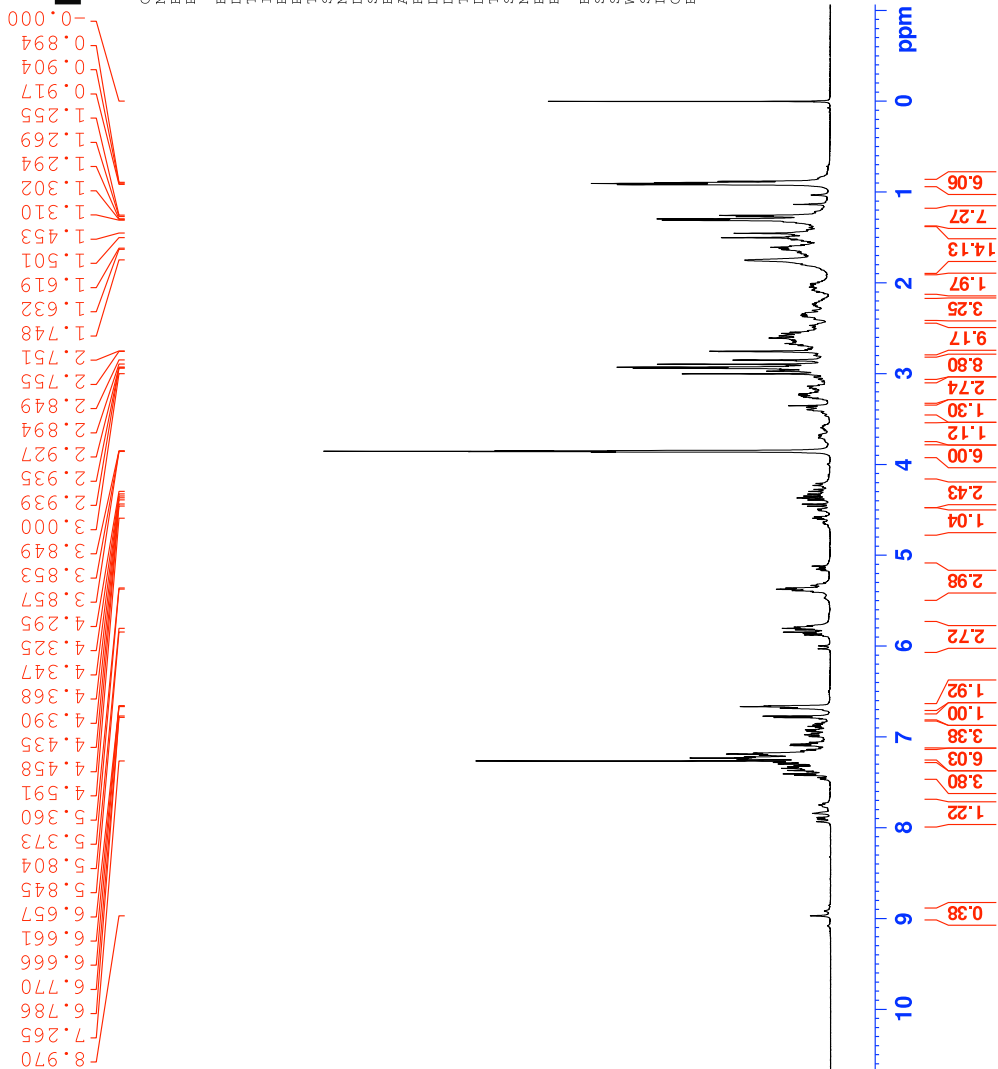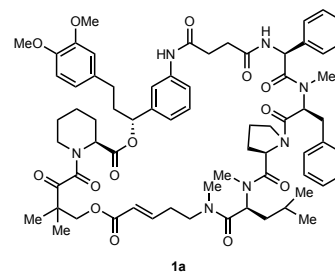

1a

# Rapadocin 1a: <sup>13</sup>C-NMR

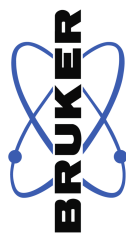

Current Data Parameters  
 NAME 2018-11-23-109-JW95-  
 EXPNO 1  
 PROCNO 1  
 F2 - Acquisition Parameters  
 Date\_ 20181125  
 Time 14.48 h  
 INSTRUM spect  
 PROBHD zgpg30  
 PULPROG zgpg30  
 TD 65536  
 SOLVENT CDCl3  
 NS 5000  
 DS 4  
 SWH 29761.904 Hz  
 FIDRES 0.908261 Hz  
 AQ 1.1010048 sec  
 RG 2050  
 DE 16.800 usec  
 TE 296.5 K  
 T1 145.000000 sec  
 T1rho 1.000000 sec  
 T2 2.000000 sec  
 T2rho 0.0068965 sec  
 T3 1.100000 sec  
 SFO1 125.687374 MHz  
 NUC1 13C  
 PU 13C  
 P2 8.75 usec  
 PL1 17.50 usec  
 SFO2 53.0000000 MHz  
 NUC2 1H  
 CPDPRG2 waltz16  
 FCPD2 80.00 usec  
 PLW2 14.0000000 W  
 PLW12 0.2887899 W  
 F2 - Processing parameters  
 SI 32768  
 SF 125.6748144 MHz  
 WDW EM  
 SSB 0  
 LB 1.00 Hz  
 GB 0  
 PC 1.40

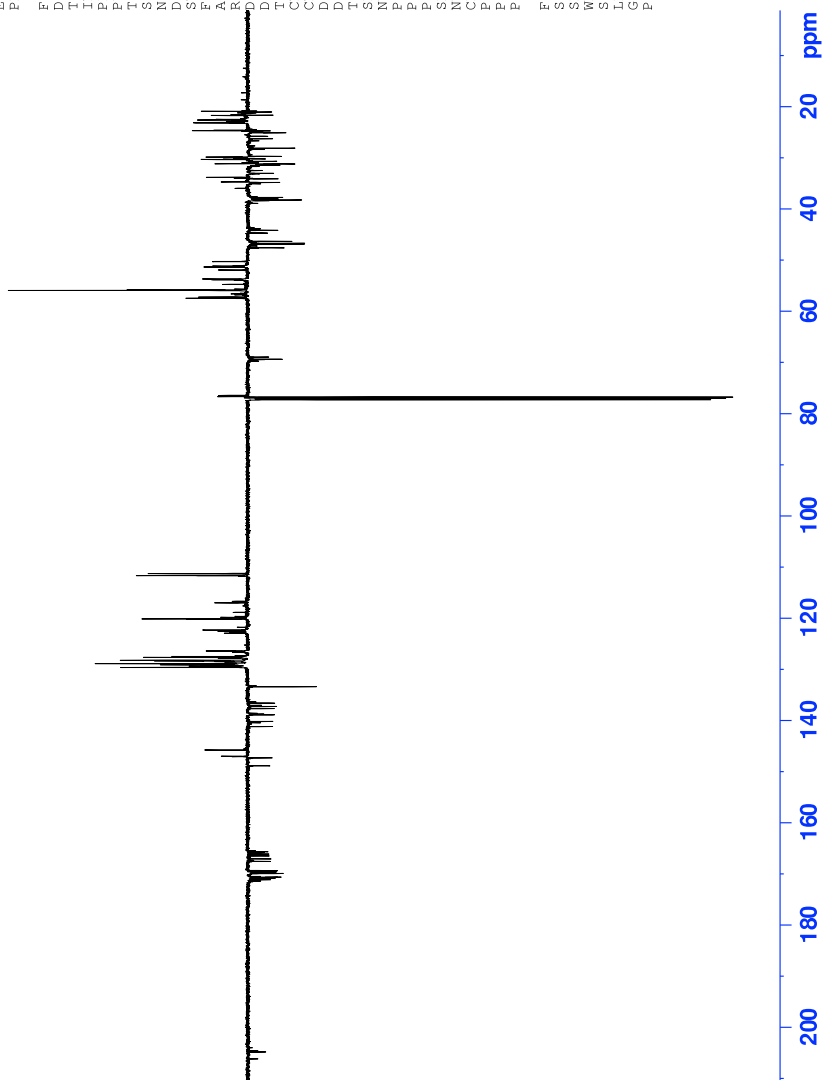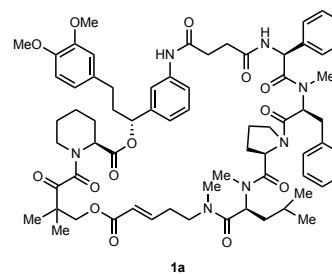

Rapadocin 1a:  $^1\text{H}$ - $^1\text{H}$  COSY

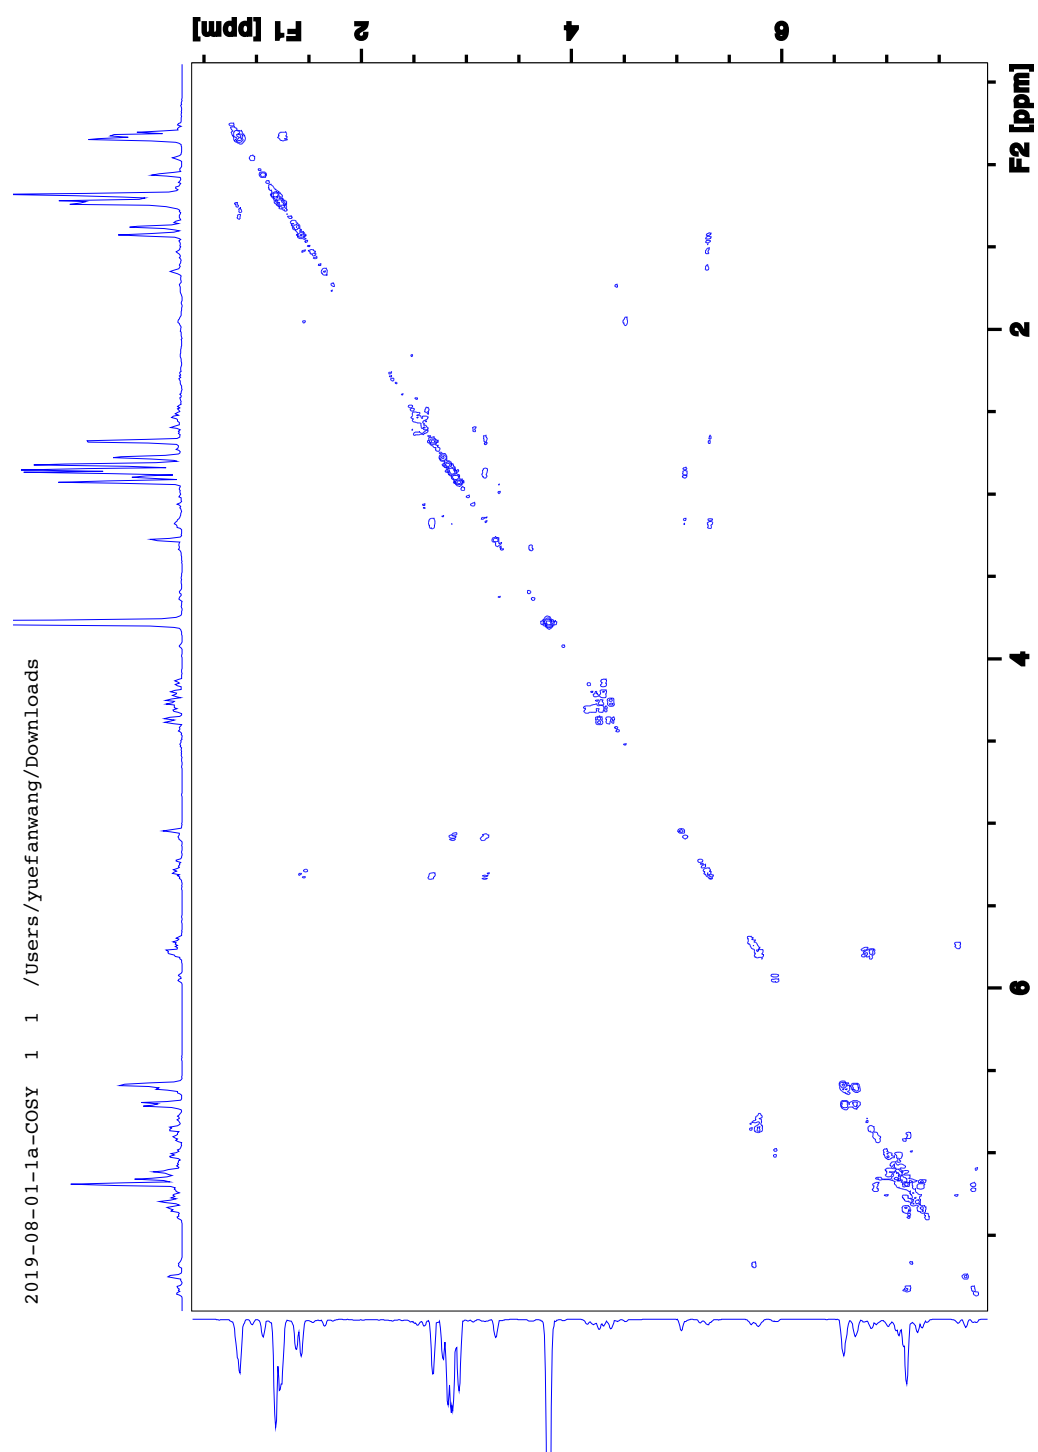

Rapadocin 1a:  $^1\text{H}$ - $^{13}\text{C}$  HSQC

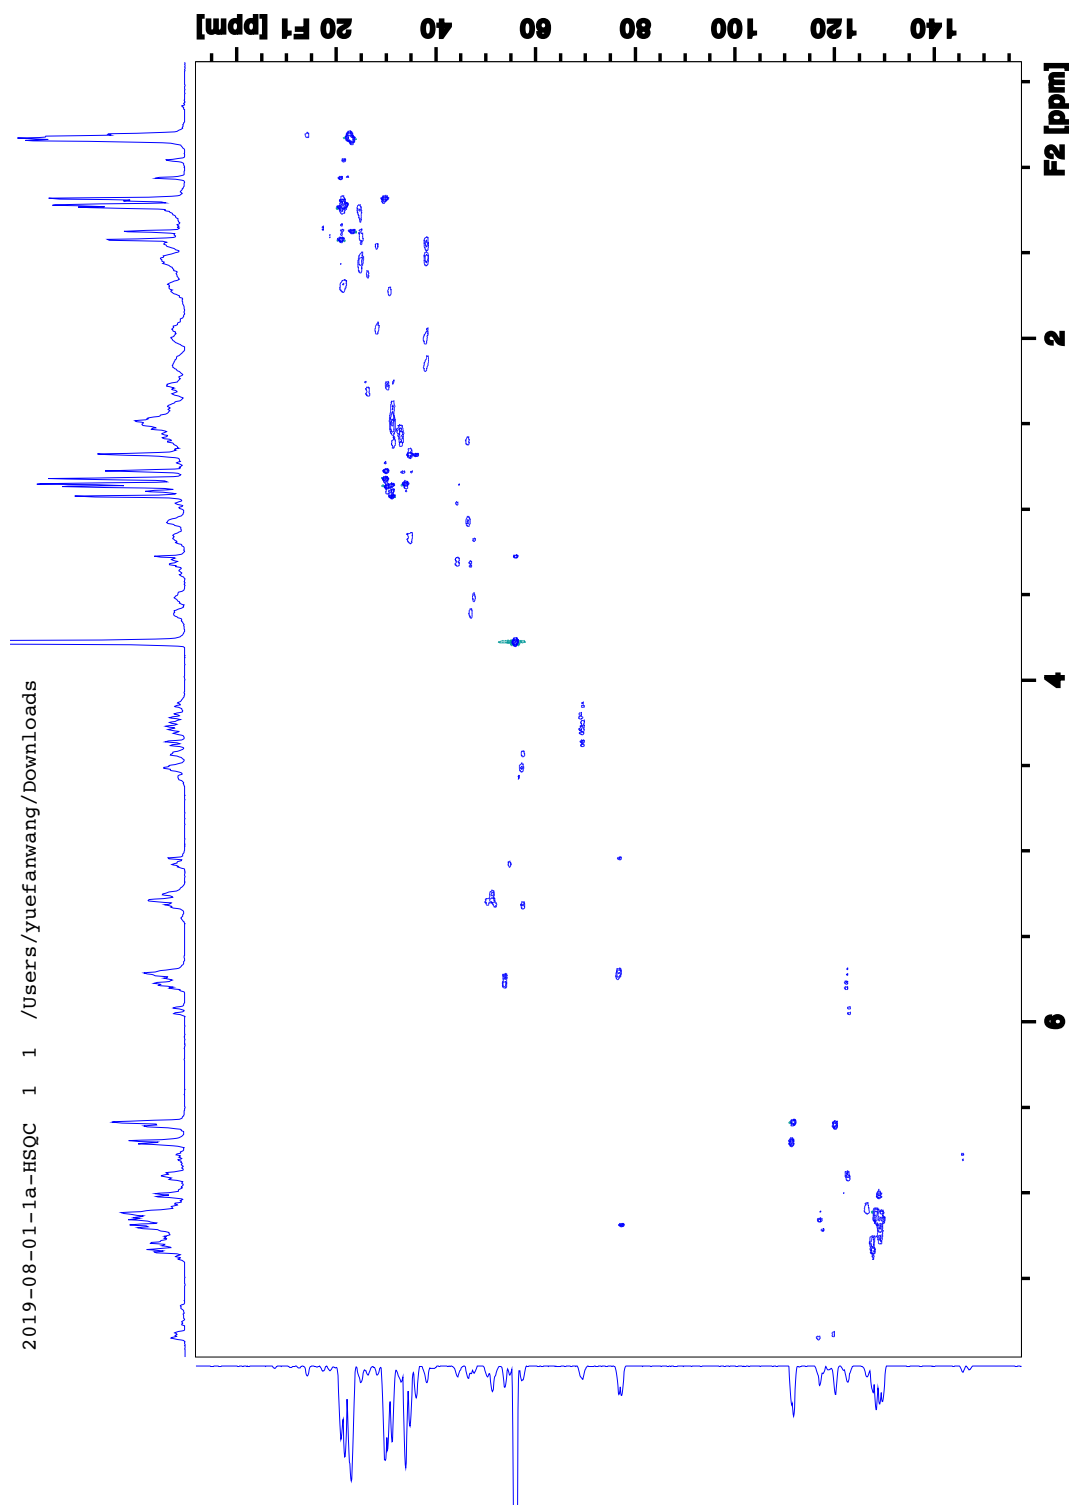



# Compound 13: <sup>1</sup>H-NMR

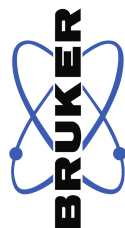

Current Data Parameters  
 NAME 2018-10-09-201-Boc-dphg-mPhe  
 PROCNO 1  
 PROGNO 1

F2 - Acquisition Parameters  
 Date\_ 20181009  
 Time 17:56 h  
 INSTRUM spect  
 PULPROG zgpg30  
 TD 65536  
 CONVENT 32  
 DS 0  
 SWH 1000.198 Hz  
 FWHZ 3.1806805 sec  
 RG 32  
 DE 48.620 usec  
 TE 294.3 K  
 T1 1.00000000 sec  
 T1RHO 0.00000000 sec  
 SFO1 499.8030865 MHz  
 NUC1 1H  
 PL1 11 usec  
 PL11 14.0000000 W  
 F2 - Processing parameters  
 SI 65536  
 SF 499.800184 MHz  
 SD 0  
 LB 0.30 Hz  
 GB 0  
 PC 1.00

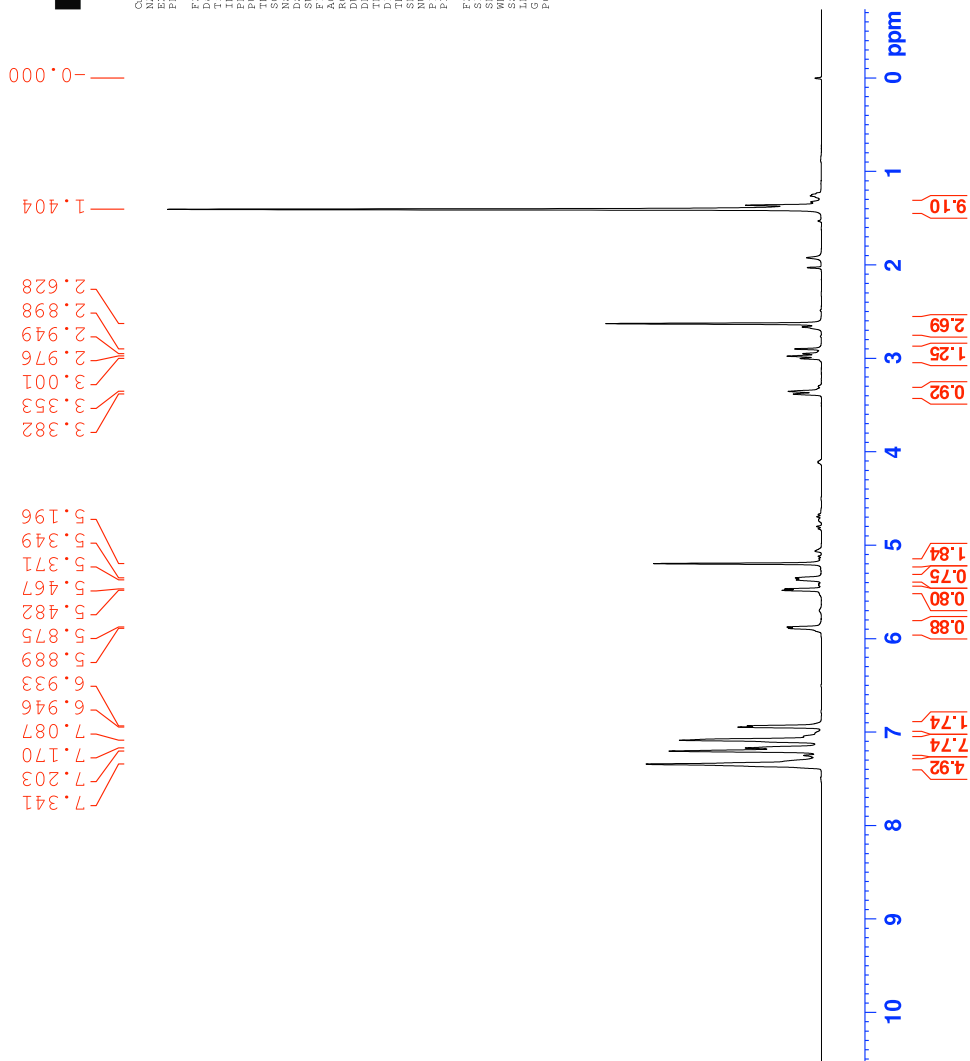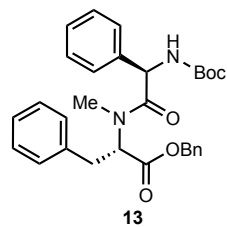

# Compound 13: <sup>1</sup>H-NMR

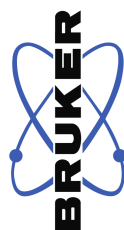

Current Data Parameters  
NAME 2018-06-25-Boc-D-Phe-mPhe-OB  
PROBHD 2800701\_0153 (

F2 - Acquisition Parameters  
Date\_ 20180625  
Time 19:39 h  
INSTRUM spect  
PROBHD 2800701\_0153 (

5.475  
5.459  
5.425  
5.408  
5.372  
5.364  
5.350  
5.342

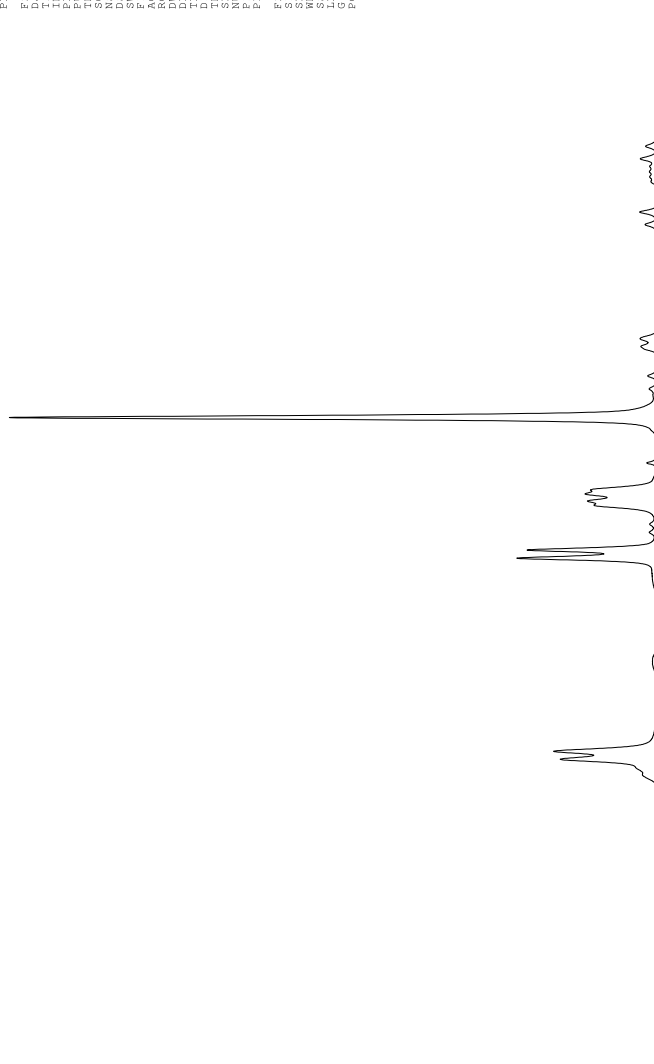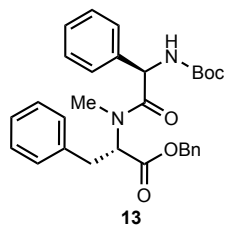

# Compound 13: <sup>13</sup>C-NMR

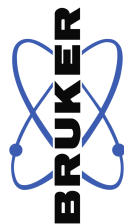

Current Data Parameters  
 Date\_ 2018-10-09-201  
 Time\_ 18.33 h  
 PROGNO 280070\_0153 (

PROBHD 280070\_0153 (

126.83  
127.59  
127.82  
128.31  
128.44  
128.68  
128.86  
135.45  
136.55  
137.22  
155.03  
170.20  
170.94  
79.66  
77.40  
77.14  
76.89  
67.16  
59.29  
55.58  
34.57  
32.87  
28.38

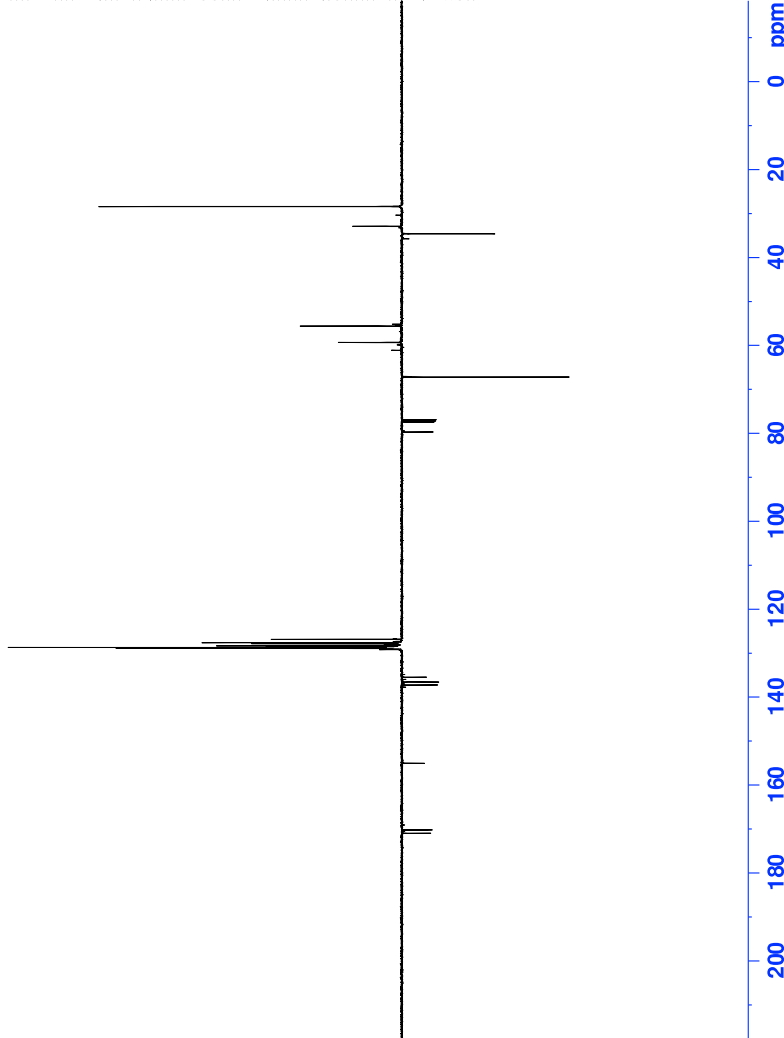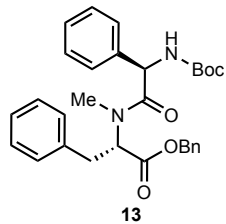

# Rapadocin 1b: <sup>1</sup>H-NMR

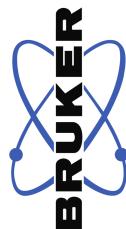

Current Data Parameters  
NAME 2018-10-26-209-JW95-dPh  
EXNO 1  
PROCNO 1

F2 - Acquisition Parameters  
Date\_ 20181026  
Time 12.12 h  
INSTRUM spect  
PROBHD zgpg30  
PULPROG zgpg30  
SOLVENT CDCl3  
NS 32  
DS 0  
SWH 10302.198 Hz  
FIDRES 0.001486 Hz  
AQ 3.1806806 sec  
RG 90.5  
DW 48.533 usec  
DE 6.50 usec  
TE 296.4 K  
TD 1.0000000 sec  
F1 11.53 usec  
NUC1 1H  
SF01 499.8030865 MHz  
F1 14.0000000 W  
F2 - Processing parameters  
SI 65536  
SF 499.8000084 MHz  
WDW EM  
SSB 0  
LB 0.30 Hz  
GB 0  
PC 1.00

8.440  
8.414  
7.849  
7.833  
7.268  
7.208  
7.197  
6.955  
6.928  
6.909  
6.889  
6.776  
6.764  
6.676  
6.656  
5.862  
5.833  
5.439  
5.385  
5.303  
5.117  
4.742  
4.731  
4.716  
4.413  
3.861  
3.855  
3.849  
3.844  
3.022  
2.915  
2.851  
2.733  
2.226  
2.166  
1.381  
1.353  
1.284  
1.256  
0.891  
0.879  
0.000

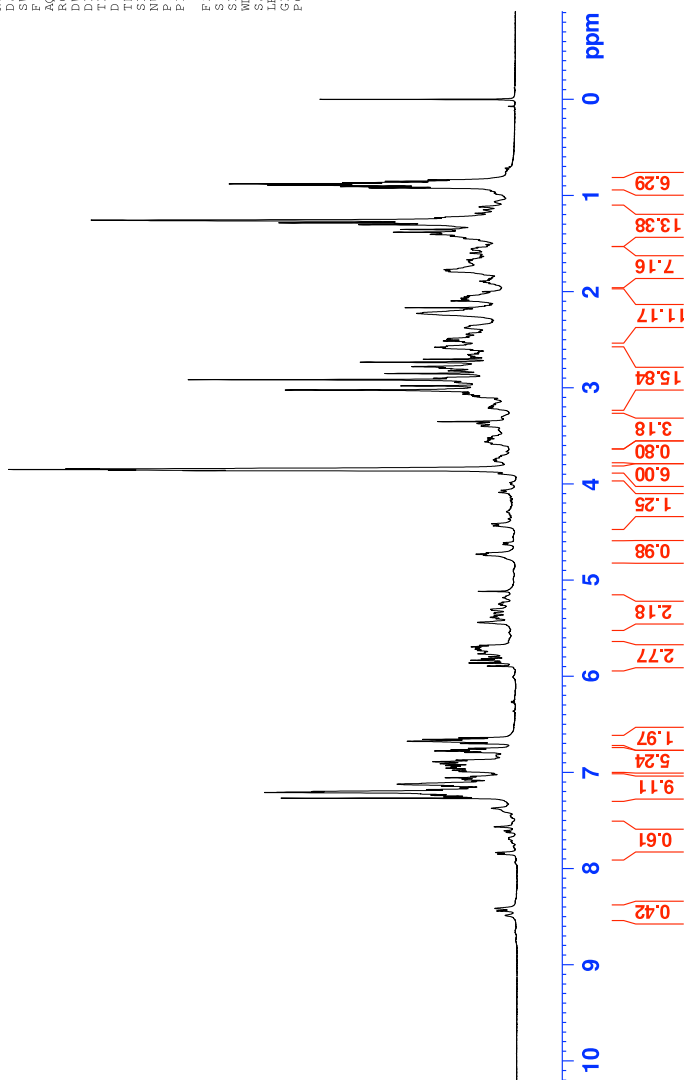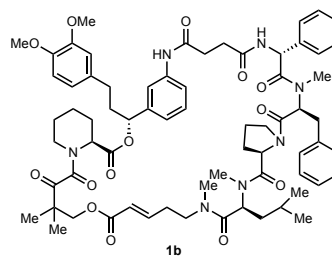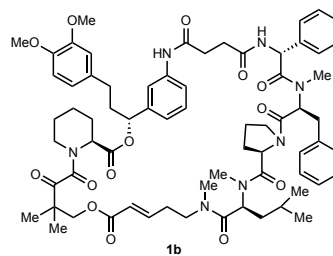



## Comparison of the Spectra of Rapadocin isomers and Solid Phase Products

### Rapadocin 1a

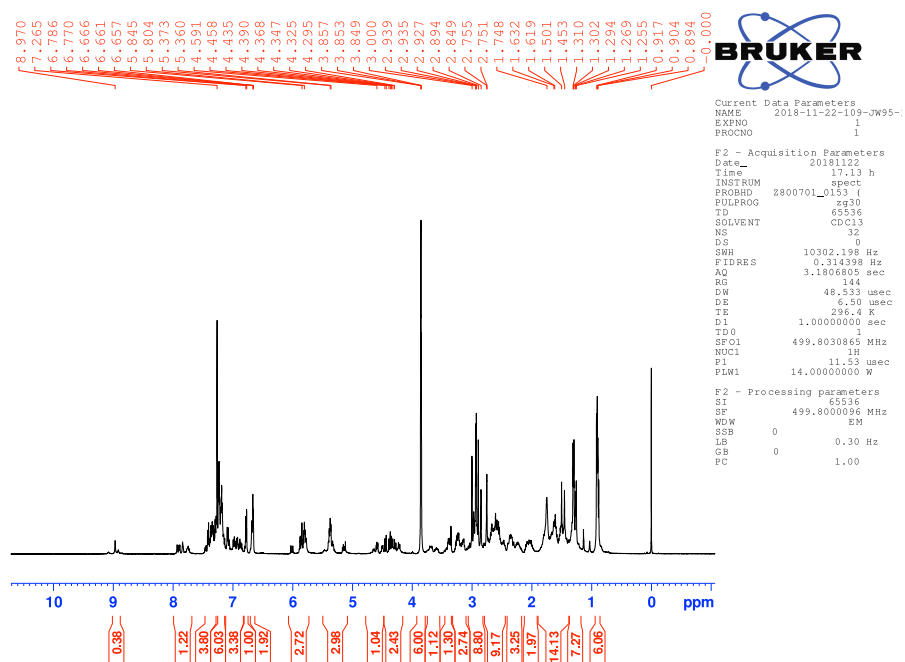

### Rapadocin 1b

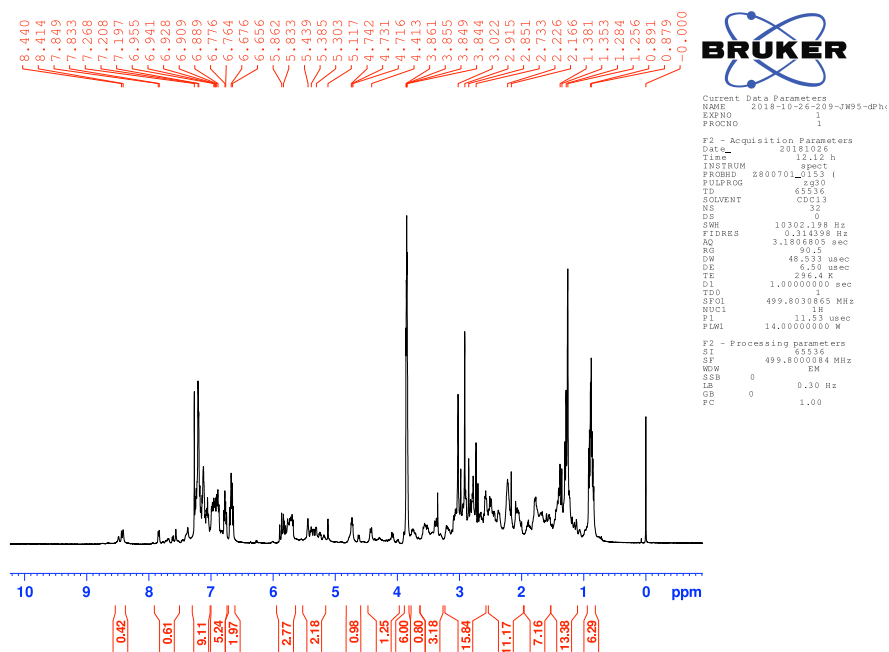

## Rapadocin 1c

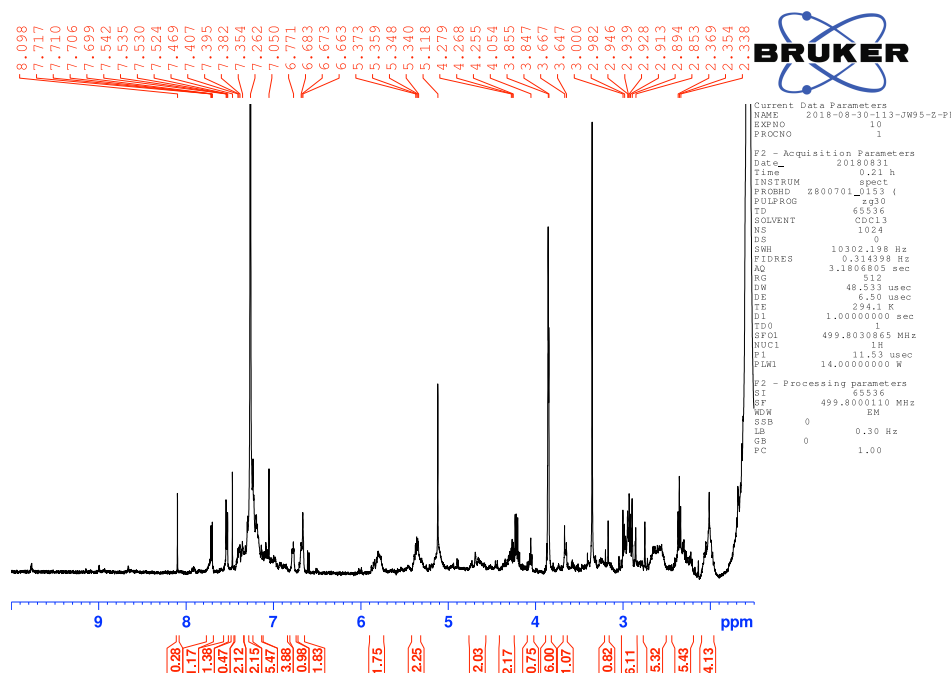

## Rapadocin 1d

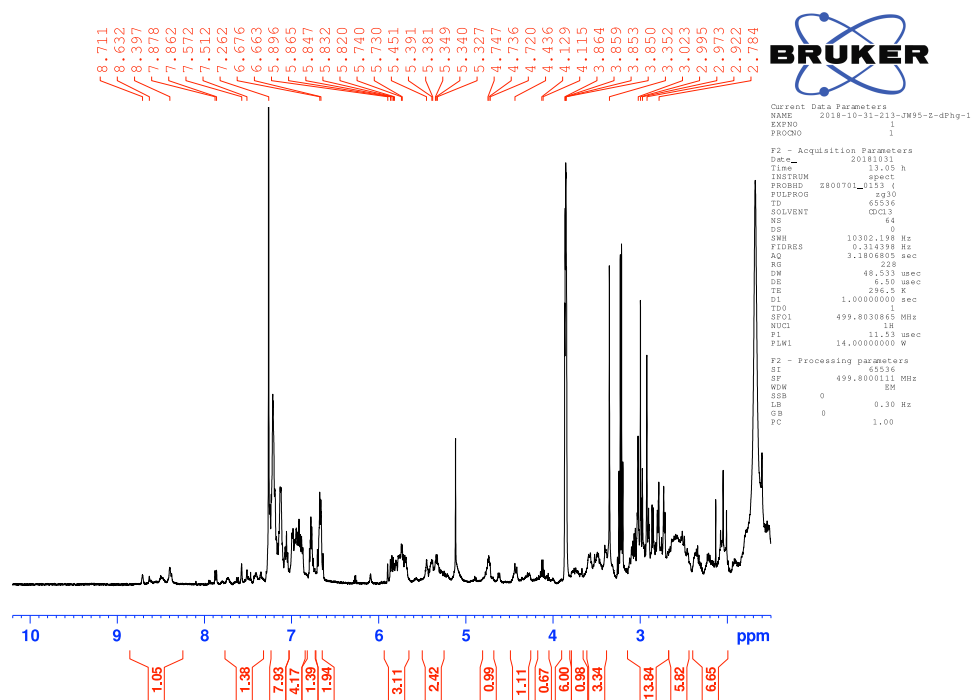

# Rapadocin from solid phase synthesis

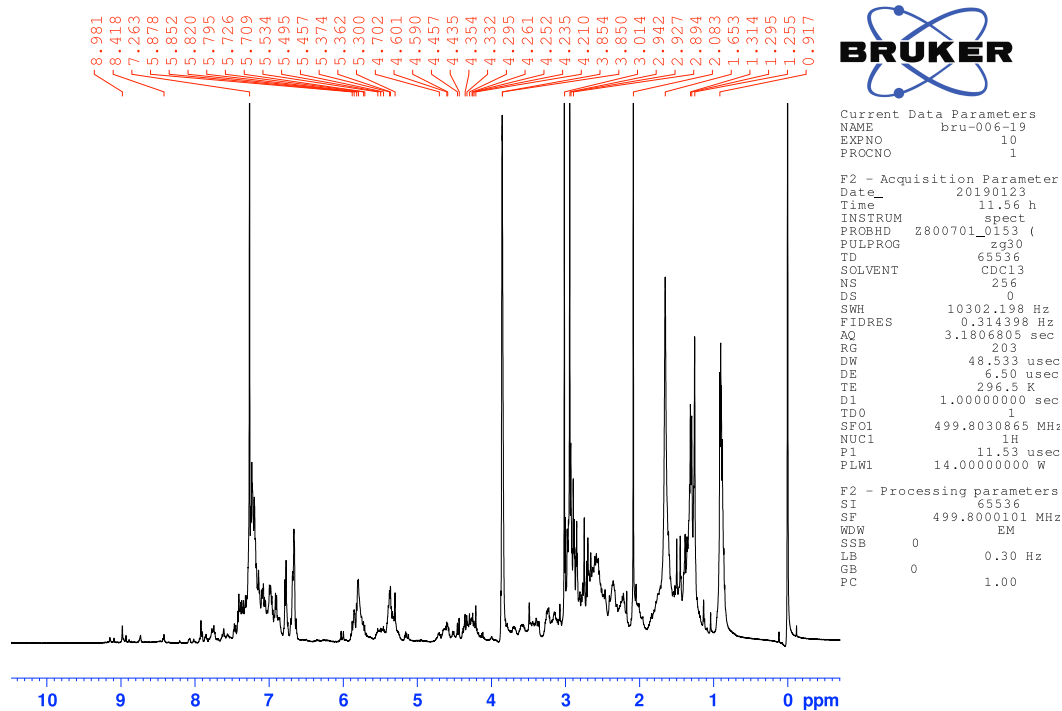



## Chromatogram of HPLC of the Rapadocin isomers and MS of the HPLC peak

HPLC chromatogram of rapadocin **1a** :

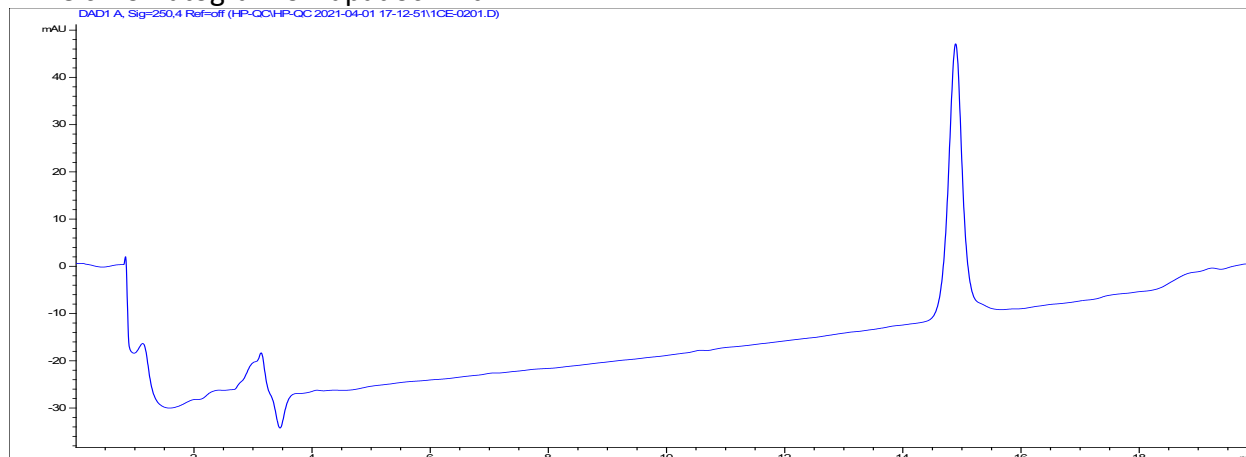

Mass spectrum for **1a** (HPLC peak at 14.89 min):

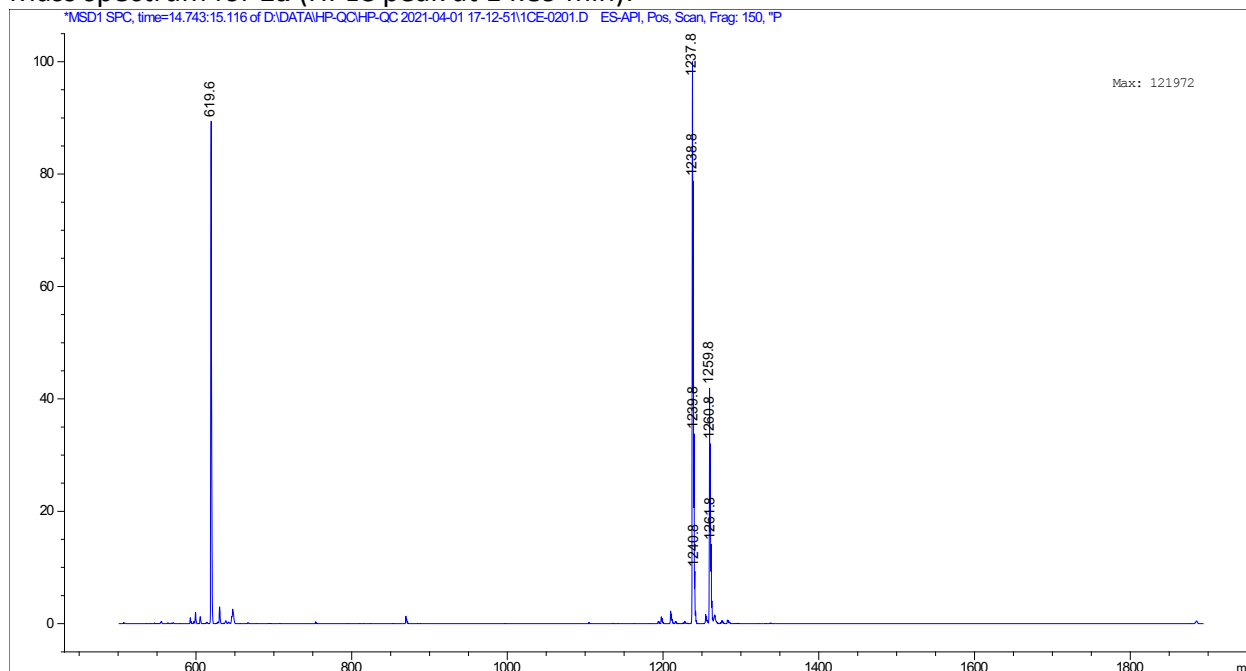

### HPLC chromatogram of rapadocin **1b** :

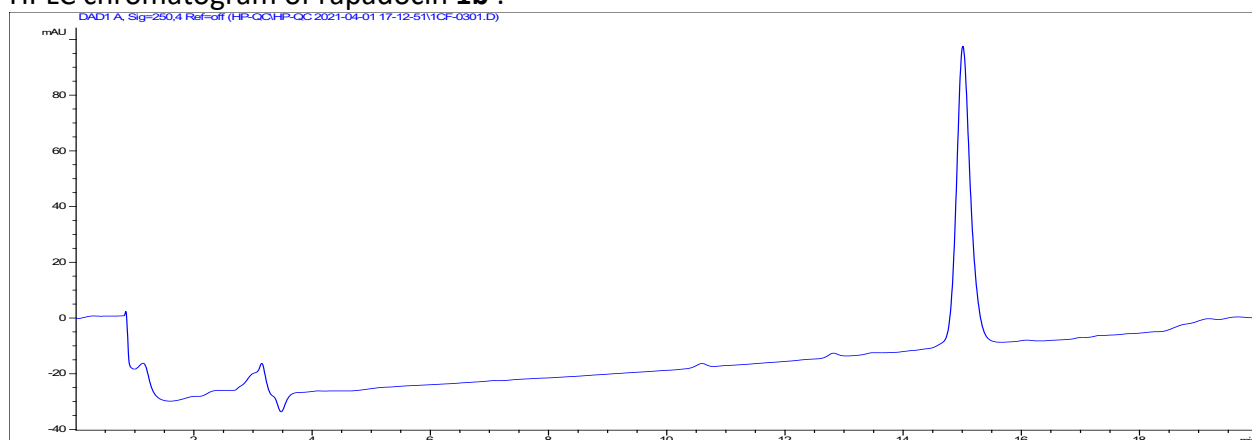

### Mass spectrum for **1b** (HPLC peak at 15.01 min):

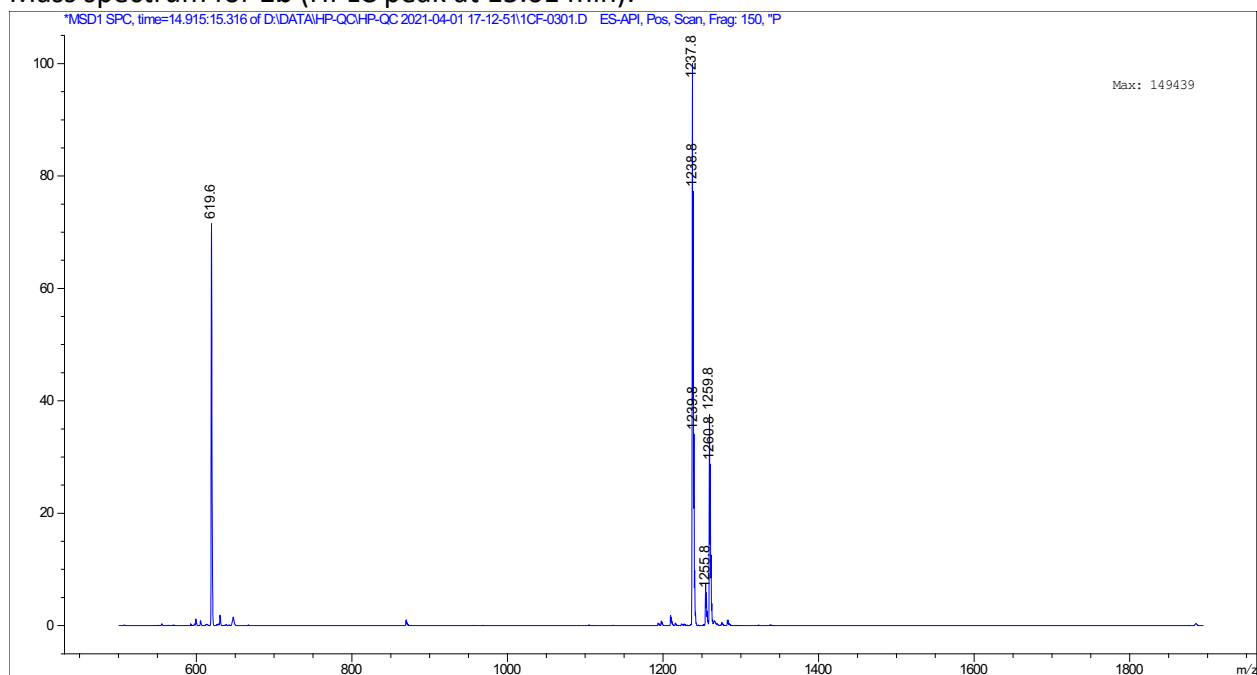

### HPLC chromatogram of rapadocin **1c** :

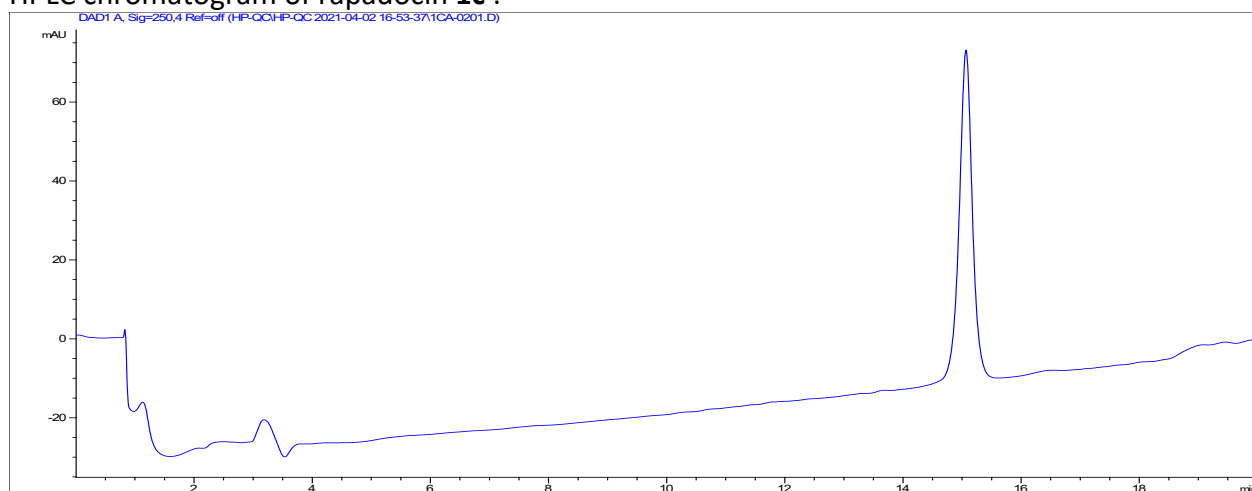

### Mass spectrum for **1c** (HPLC peak at 15.07 min):

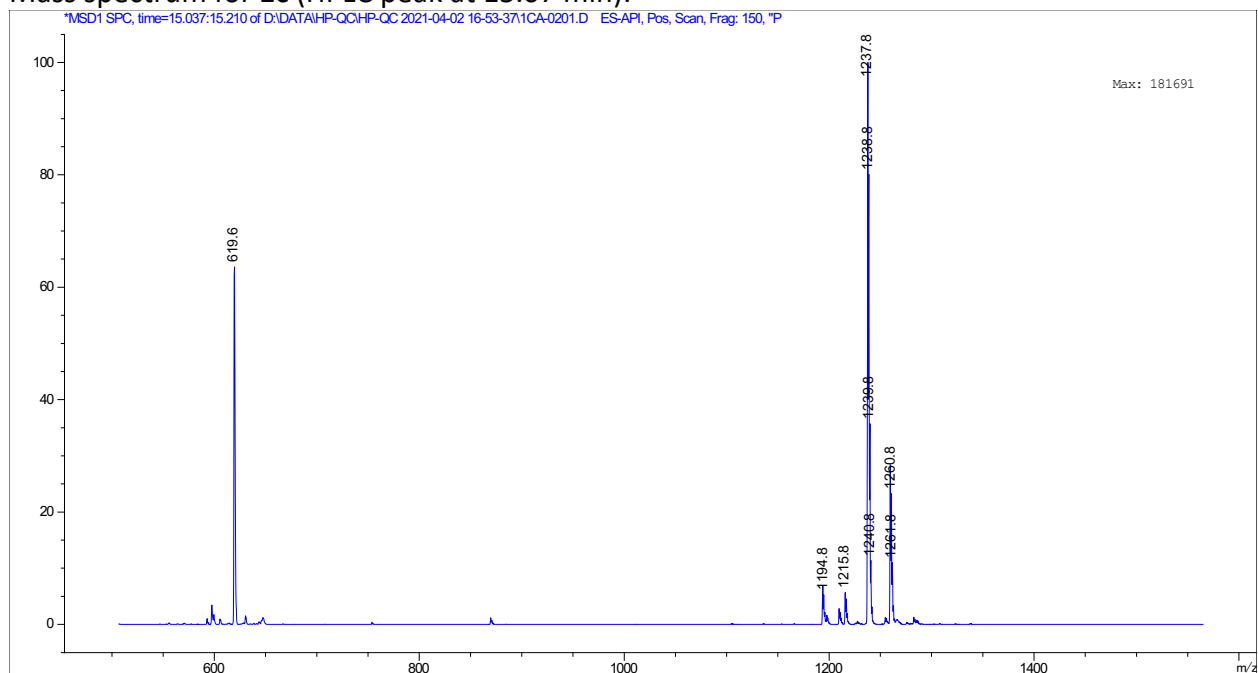

### HPLC chromatogram of rapadocin **1d** :

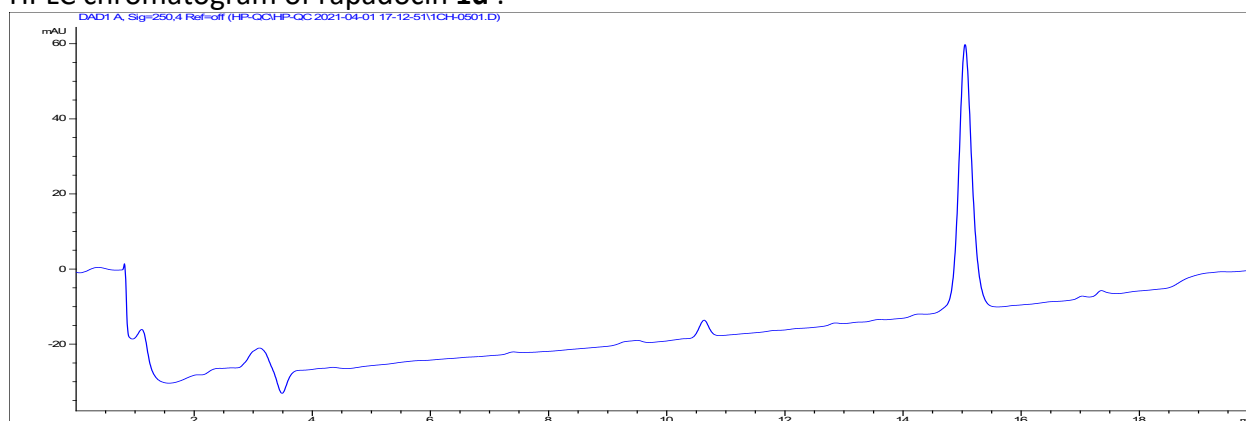

### Mass spectrum for **1d** (HPLC peak at 15.05 min):

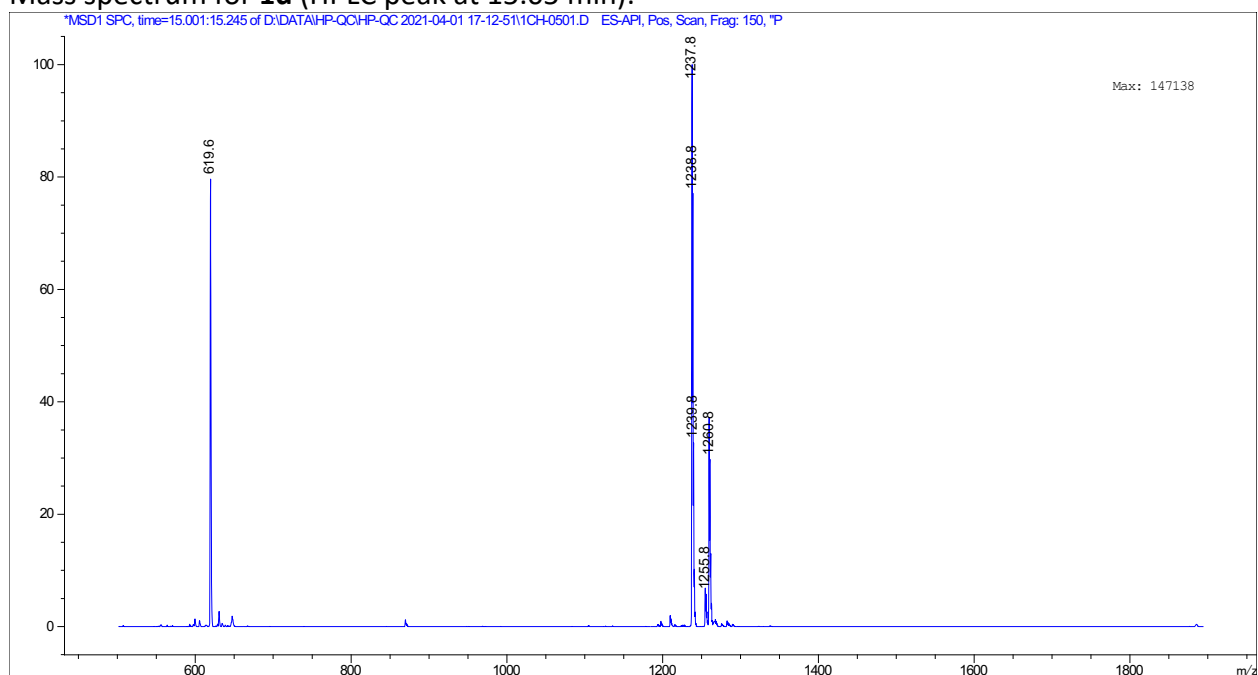

## Chromatogram of HPLC of the 1c and 1d decomposed crude solution and MS of the HPLC peak

### Decomposed crude solution of 1c

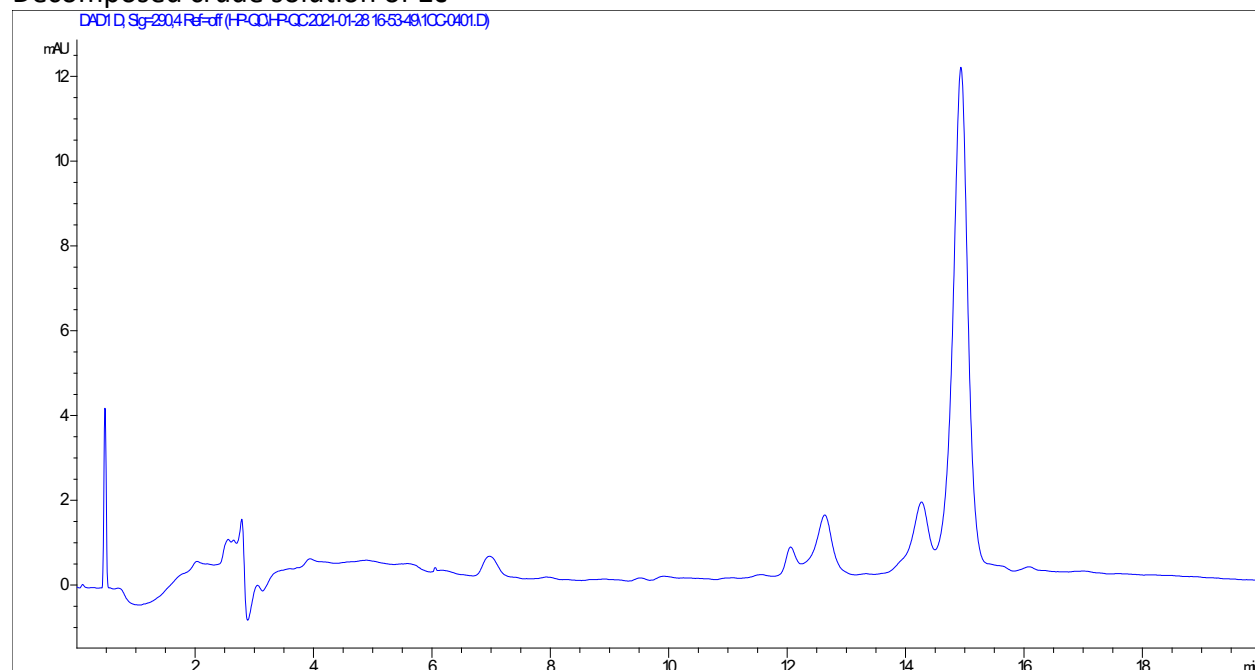

### Mass spectrum for crude solution of 1c (HPLC peak at 14.8 min):

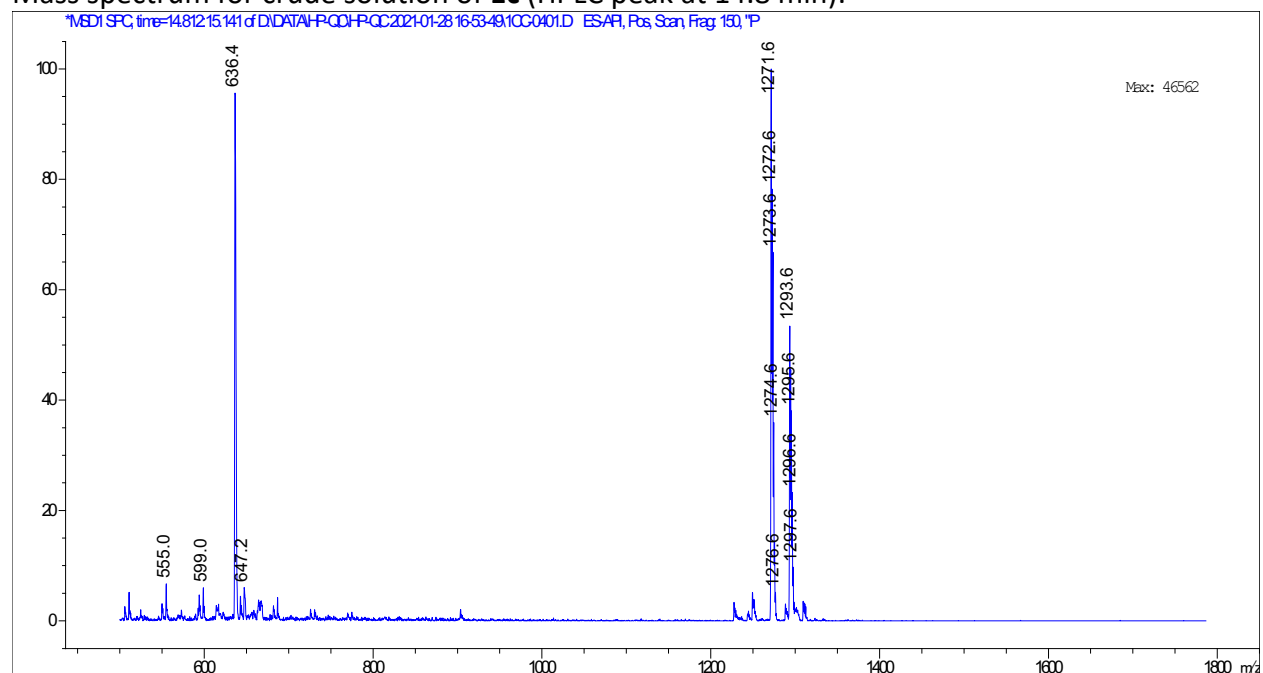

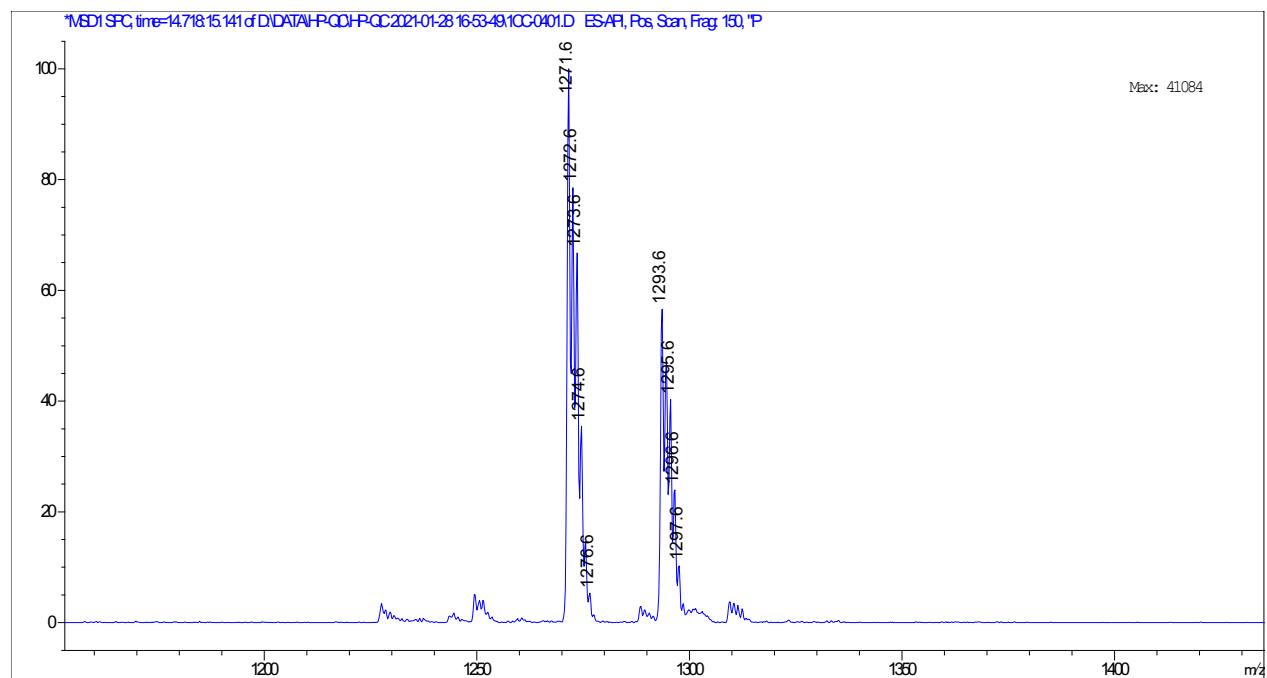

### Decomposed crude solution of **1d**

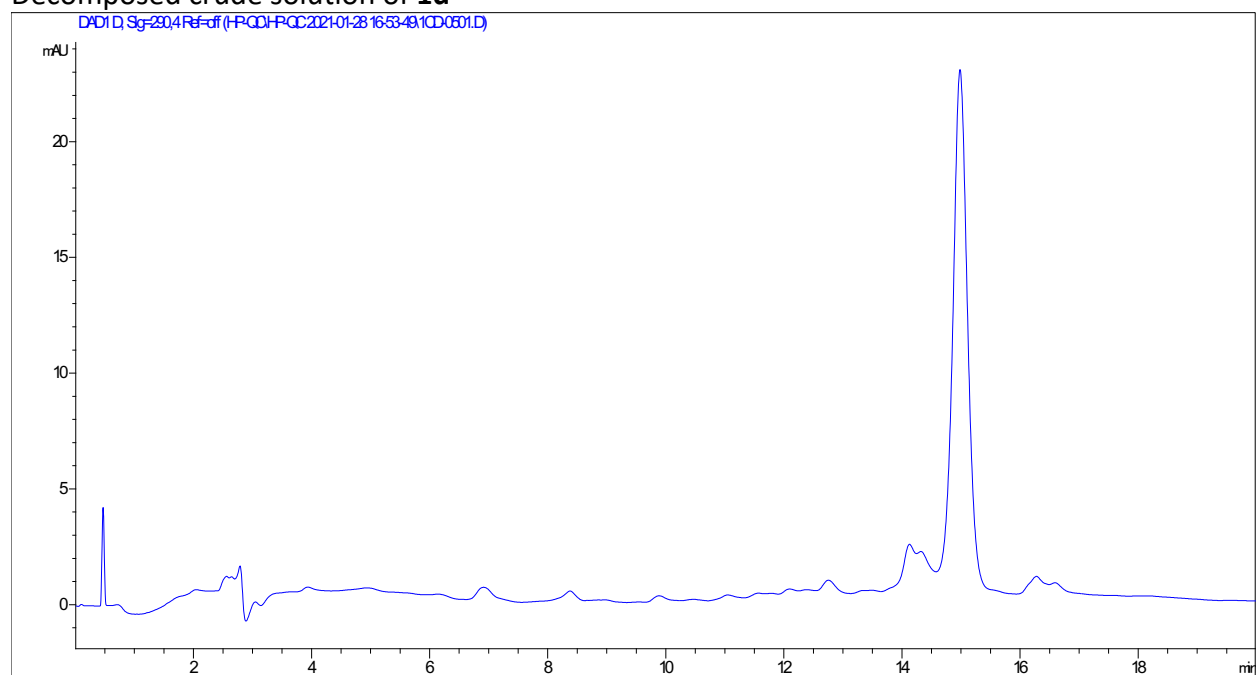

Mass spectrum for crude solution of **1d** (HPLC peak at 14.9 min):

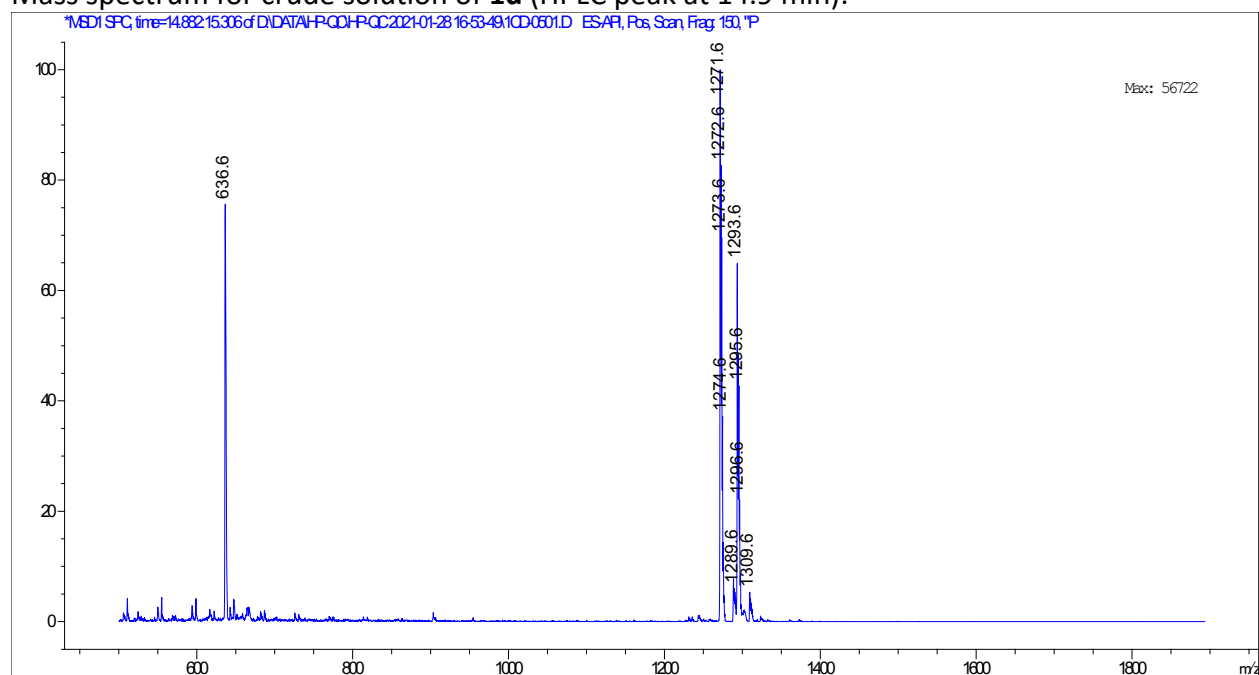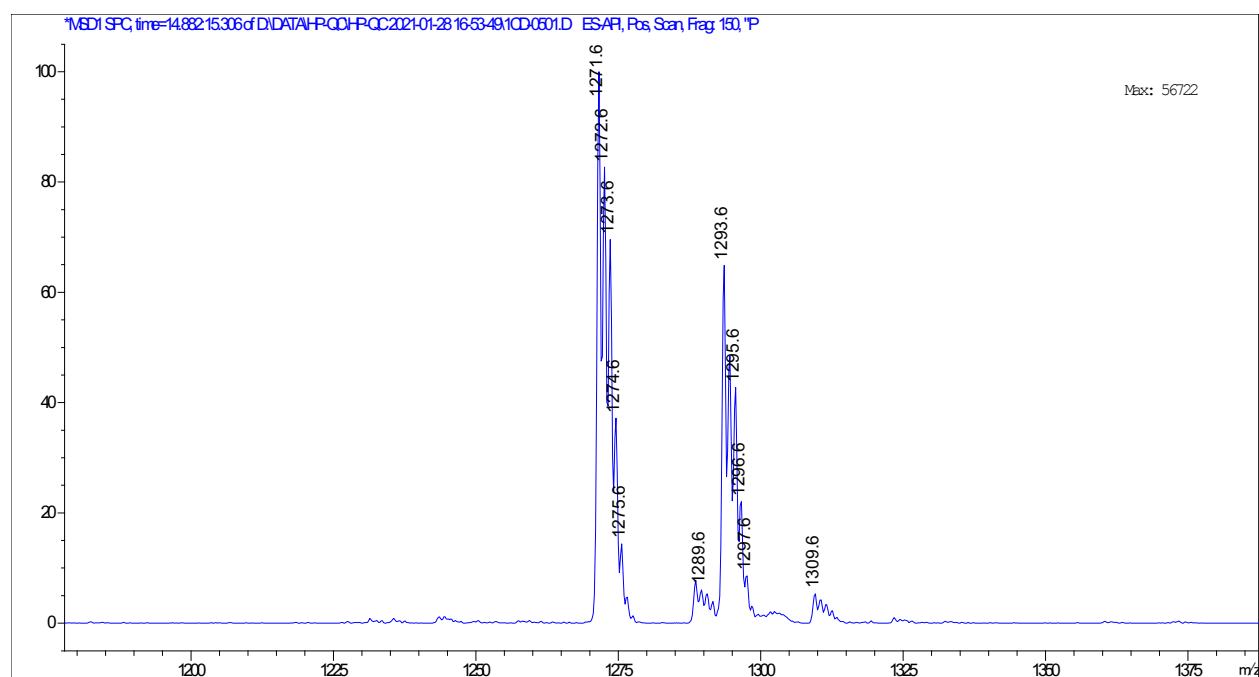

## References

- [1] K. Mahendrarajah, et al. *Anal. Biochem.* **2011**, 411, 155-157.
